# Supplementary material for: The vegetation of Holocene coastal dunes of the Cape south coast, South Africa
Source: PeerJ. 2023 Dec 12;11:e16427. doi: 10.7717/peerj.16427 (PMC10722985; doi:10.7717/peerj.16427)
Supplement: Supplemental Information 1 — The sites-by-species matrix, with data points representing the percentage cover abundance of each species and details about each vegetation plot. [file peerj-11-16427-s001.xlsx]

## Sheet: Community data
plot_id	Sideroxylon inerme L.	Euclea racemosa Murray	Mystroxylon aethiopicum (Thunb.) Loes. subsp. aethiopicum	Asparagus aethiopicus L.	Pterocelastrus tricuspidatus (Lam.) Walp.	Ficinia ramosissima Kunth	Helichrysum teretifolium (L.) D.Don	Searsia undulata (Jacq.) T.S.Yi, A.J.Mill. & J.Wen	Cynanchum africanum (L.) Hoffmanns.	Metalasia muricata (L.) D.Don	Viscum capense L.f.	Rubia petiolaris DC.	Grewia occidentalis L.	Polygala myrtifolia L.	Searsia crenata (Thunb.) Moffett	Dovyalis rhamnoides (Burch. ex DC.) Burch. & Harv.	Carissa bispinosa (L.) Desf. ex Brenan	Behnia reticulata (Thunb.) Didr.	Clausena anisata (Willd.) Hook.f. ex Benth.	Stachys aethiopica L.	Allophylus decipiens (Sond.) Radlk.	Cussonia thyrsiflora Thunb.	Cassine peragua L.	Secamone alpini Schult.	Asparagus plumosus Baker	Acokanthera oppositifolia (Lam.) Codd	Chasmanthe aethiopica (L.) N.E.Br.	Senecio quinquelobus (Thunb.) DC.	Euphorbia erythrina Link	Dioscorea mundii Baker	Rhoicissus digitata (L.f.) Gilg & M.Brandt	Panicum deustum Thunb.	Cynanchum natalitium Schltr.	Roepera sessilifolia (L.) Beier & Thulin	Diospyros whyteana (Hiern) F.White	Lauridia tetragona (L.f.) R.H.Archer	Olea exasperata Jacq.	Apodytes dimidiata E.Mey. ex Arn.	Gymnosporia buxifolia (L.) Szyszyl.	Pteridium aquilinum (L.) Kuhn	Anemone vesicatoria (L.f.) Prantl subsp. vesicatoria	Asparagus africanus Lam.	Azima tetracantha Lam.	Hypoestes aristata (Vahl) Sol. ex Roem. & Schult. var. aristata	Kedrostis nana (Lam.) Cogn.	Sutera griquensis Hiern	Amaranthus thunbergii Moq.	Bonatea speciosa (L.f.) Willd.	Solanum sodomaeodes Kuntze
CVSD0018	0.5	0.5	0.5	3	0.5	3	0.5	0.5	0.1	3	0.5	0.5	0	0	0	0	0	0	0	0	0	0	0	0	0	0	0	0	0	0	0	0	0	0	0	0	0	0	0	0	0	0	0	0	0	0	0	0	0
CVSD0019	0.1	63	0.5	3	0	0	0	0	0	0	0	0	0.1	0.5	15.5	0	0	0	0	0	0	0	0	0	0	0	0	0	0	0	0	0	0	0	0	0	0	0	0	0	0	0	0	0	0	0	0	0	0
CVSD0020	0.1	3	15.5	0.1	0	0.1	0	0	0	0	0	0	0	0.1	0	3	0.1	0.1	3	3	15.5	0.1	15.5	3	0.1	0.1	0.1	0.1	0.1	0.1	0	0	0	0	0	0	0	0	0	0	0	0	0	0	0	0	0	0	0
CVSD0021	15.5	15.5	15.5	0.1	0.1	0	0	0	0	0	0	0	0.1	0	0	15.5	0.1	0.1	0	0	0	0.1	15.5	3	0.1	0	0	0	0	0.5	0.1	3	0.1	0.1	3	0.5	0	0	0	0	0	0	0	0	0	0	0	0	0
CVSD0022	0.1	3	15.5	0.1	15.5	3	0	0	0	3	0	0.1	0.1	0	0.1	0	3	0	0	0	0	3	3	0.5	0	0	0	0	0	0	0.1	0	0	0.1	0	0	3	0.1	0.1	0.1	0	0	0	0	0	0	0	0	0
CVSD0023	0	15.5	15.5	3	15.5	0	0	0	0	3	0	0	0.5	3	0	0	3	0	0	0	0	3	0.5	0.5	0	0	0	0	0	0	0	0	0.5	0.1	0	0	15.5	0.1	0.5	0	0	0	0	0	0	0	0	0	0
CVSD0024	15.5	15.5	15.5	0.1	0	0.1	0	0	0	0	0	0	15.5	0.1	0	0	3	0	0.1	0	0	0.1	3	0	0	0.1	0.5	0	0.1	0	0	0.1	0	0	0	0	0.1	0	0	0	0	0	0	0	0	0	0	0	0
CVSD0025	15.5	15.5	3	3	0.1	0	0	0.1	0	0	0	0	0.5	0.5	0	3	0.1	0.1	0.1	0.1	0.1	0.1	15.5	3	15.5	0.1	0	0	0	0.5	3	0	0	0	0.5	3	0	0.5	0	0	0.1	0.5	0	0	0	0	0	0	0
CVSD0026	63	0	0.5	0.1	0	0	0	0	0	0	0	0	0	0	0	0	0	0.1	0.1	0	0	0	0	0	0	0	0	0	0	0	0	0.1	0.1	3	0.1	0	0	0	0	0	0.1	0	0.1	0.1	0	0	0	0	0
CVSD0027	3	15.5	15.5	3	3	0	0	0	0	0	0	0	0.1	0.1	0	0.1	3	0	0	0	0	3	15.5	0	0.1	0.1	0	0	0	0	3	0.1	0	0.1	0	0	0	0.1	0	0	0	0	0	0	0	0	0	0	0
CVSD0028	38	3	3	3	0.1	0	0	0.5	0	0	0	0	0.1	3	0	0.1	0.1	0.1	0.1	0.5	0.1	0.1	3	0.1	15.5	0.5	0	0	0.5	0	3	0	0	0	0.1	0	0.1	0	0	0	0.1	0.1	0.5	0	0.5	0	0	0	0
CVSD0029	15.5	3	3	0.1	0.1	0	0.1	0	0	0.1	0	0	0	0.1	0	3	0.1	0	0	0.1	0	0.1	3	0	0	0.1	0	0	0	0	0.1	0.1	0	0.1	0	0	0	0	0	0	0.1	0	0	0	0	0	0	0	0
CVSD0030	63	0.1	0.1	0.1	0.1	0	0	0.1	0	0	0	0	0.1	0.1	0	0.5	3	0.5	0	0	0	0.5	0	0.1	0.5	0	0	0	0	0	3	0	0.1	0.1	3	0	0.5	0	0	0	0	0	0	0	0	0	0	0	0
CVSD0031	0.1	15.5	3	0.1	3	0	0	0.1	0	0	0	0	0.5	0.1	0	0.1	3	0.1	0	0.1	0	3	15.5	3	3	0	0	0	0	0	3	0	0	0	0	0.1	0.1	0.1	0.5	0.1	0.1	0	0	0	0	0	0	0	0
CVSD0032	3	0.1	0.1	0.1	15.5	0.1	0.5	0.5	0	0	0.5	0	0.1	0.1	0	3	0.1	0.1	0	0.1	0	3	15.5	3	0.1	3	0	0	0	0	38	0	0	0	0	0	0	15.5	0.1	0.1	0.1	0.5	0	0	0	0	0	0	0
CVSD0033	15.5	0.1	3	3	0.1	0.1	0	0	0	0	0.5	0	0.1	0.1	0	0.1	0.1	0.1	0.1	0	3	3	3	3	3	0	0	0	0.1	0	3	0.1	0	0	0.1	0	0	0	15.5	0.1	0.1	0	0	0	0	0	0	0	0
CVSD0034	38	3	0.1	0.1	0	0.1	0	0	0	0	0	0	0.5	0	0	3	0.5	0.1	0.5	0	0.5	3	0	3	3	0	0	0.5	0	0	3	0.1	0	0	0.1	0	0	0	0.5	0	0	0	0	0	0	0	0	0	0
CVSD0035	38	15.5	15.5	0.1	0	0	0	0.1	0	0	0	0	0.5	0.1	0	3	0	0.1	0	0	15.5	3	15.5	15.5	0	0	0.5	0	0	0	3	0.1	0.1	0	0	0	0	0	0.1	0	0	0	0	0	0	0	0	0	0
CVSD0036	38	3	15.5	3	15.5	0	0	0.1	0	0	0	0	0.1	0.1	0	0.1	0.1	0	0.1	0	15.5	3	3	3	3	0	0	0	0	0	3	0.1	0	0.5	3	0.1	0.1	0	0	0	0	0	0	0	0	0	0	0	0
CVSD0037	15.5	15.5	15.5	0.1	15.5	0	0	0	0.1	0	0	0	0.1	3	0	0.1	3	0	0	0	0	15.5	15.5	0.1	3	0	0	0	0	0	3	0.1	0	0	0	0	3	0	0	0	0	0	0	0	0	0	0	0	0
CVSD0038	15.5	38	3	3	0.1	0	0	0	0.5	0	0	0	0.1	0.1	0	3	0.1	0.5	0	0.1	0	0	3	0	3	0.1	0	0	0	0	3	3	0	3	3	3	0	0	0	0	0.1	0	0.5	0	0	0	0	0	0
CVSD0039	15.5	15.5	15.5	0.1	15.5	0	0	0	0	0	0	0	0.5	3	0	0	3	0	0	0	0	3	38	0.1	3	0.1	0	0	0	0	3	0	0	0	0	3	15.5	0.1	3	0	3	0.5	0	0	0	0	0	0	0
CVSD0040	15.5	3	3	3	0	0	0	0	0	0	0	0	3	0.1	0	0.1	3	3	0	3	0	0.1	3	0	0	0	0.5	0.1	0	0.1	3	0.1	0	3	0	0	0.1	0	0	0	0.5	0	0.5	0	0.5	0	0	0	0
CVSD0041	15.5	15.5	15.5	0.1	0	0	0.1	0	0	0	0	0	0.1	0.5	0.1	0.1	0	0.1	0	0.1	0	3	3	15.5	0	0.5	0.5	0	0	0	3	0	0.1	15.5	0	0	0	0	0	0	0.5	0	0.1	0	0	0	0	0	0
CVSD0042	0.5	3	0	3	38	0	0.1	0	0	0	0	0	0	0.1	0	0	3	0	0	0	0	3	3	0	0	0	0	0	0	0	3	0	0	0.1	0	0	38	0	0	0	3	0	0	0	0	0	0	0	0
CVSD0043	38	0.1	15.5	0.1	3	0	0	0	0	0	0	0	0.1	0.1	0	0.1	3	0.1	0.1	15.5	15.5	15.5	15.5	0.1	0	0	0	0.5	0	0.5	3	0	0	0.1	0	0	0	0	0.1	0	0.5	0	15.5	0	0	0	0	0	0
CVSD0044	38	15.5	0	3	0.1	0	0	0	0	0	0	0	0.1	0	0.1	3	0.1	0.1	3	0	0	3	15.5	0.1	0	0	0	0	0	0	3	0.1	0.1	0	0	0	0	0	3	0	0.5	0	0.5	0	0	0	0	0	0
CVSD0045	3	15.5	38	3	15.5	0	0	0	0	0	0	0	0	0.1	0	0.1	3	0.5	0	0.1	0	15.5	15.5	15.5	0	0.1	0	0	0	0	3	0.1	0.1	0	0	0	0	0	0	0	0	0	0	0	0	0	0	0	0
CVSD0046	38	3	0.1	3	3	0	0	0	0	0	0	0	0.5	0	0	15.5	0.1	0.5	3	3	0	3	0	0	0.1	0	0.1	0	0	0	15.5	0	0.1	0.1	3	0	0	0	0	0	0.5	0	0.1	0	0	0	0	0	0
CVSD0047	63	0.1	15.5	3	0.5	0	0	0	0	0	0	0	0.1	0.5	0	15.5	3	0.1	3	0.1	0	15.5	0	0	0	0	0	0	0	0	3	0.1	0.1	0	3	0	0	0	3	0	0	0	0	0	0	0	0	0	0
CVSD0048	63	0.5	3	15.5	0	0	0	0	0	0	0	0	0	0	0	3	0	0.1	0.5	0	0	0	0	0	0	0	0	0	0	0	0	0	0.5	3	0	0	0	0	0	0	0	0	15.5	0	0	0	0	0	0
CVSD0049	38	15.5	15.5	0.1	0	0	0	0	0	0	0.5	0	0.1	0.1	0	0.1	0.1	0.1	0	0.5	0.1	0.1	0	0	0	0	0	0	0.1	0.1	0.1	0.1	0	3	0	0	3	0	0	0	0.1	0	0.1	15.5	0.1	0	0	0	0
CVSD0050	63	0.1	3	0	0	0	0	0	0.1	0	0	0	0.1	0.1	0	15.5	0	15.5	0.1	0	0	0	3	0.1	0	0	0	0.1	0.1	0	0	0	0.1	15.5	0	0	0	0	0	0	0	0	15.5	38	0.1	3	0	0	0
CVSD0051	88	0	0	0	0	0	0	0	0.1	0	0	0.1	0.5	0	0	0	0.1	0.5	0.1	0	0	0	0	0	0.1	0	0	0.5	0	0	0	3	0	0	0	0	0.1	0	0	0	0	0	0	0.1	0	0.5	0.1	0.5	0
CVSD0052	38	0.5	0.1	0.1	0	0	0	3	0	0	0	0	0	0	0	3	0.1	0	3	0.1	0	0	0	0	0	0	0	0.5	0	0.5	3	0	0	0	0	0	0	0	3	0	0	0	3	3	0	0	0	0.5	0
CVSD0053	63	3	3	0.1	0	0	0	0	0	0	0	0	0	0	0	3	0	0.1	3	0	0	0	0	0	0	0	0	0.1	0	0	0.1	0	0.1	0	0	0	0	0	0	0	0	0	0.1	15.5	0.5	0	0.1	0.5	0
CVSD0054	63	0	15.5	0.1	0	0	0	0	0.1	0	0	0	3	0	0	3	0	0.1	3	0.1	0	0	0	0	0	0	0	0.5	0	0	0	0	0.1	0	0	0	0	0	0	0	0	0	0	15.5	0.1	0	0.1	0.5	0
CVSD0055	38	0.1	15.5	0	15.5	0	0	3	0	0	0	0	0.1	0.1	0	38	0	0	0	0.5	15.5	0	0	0	0	0	0	0	0.1	0	0.1	0.1	0	0	0	0	0	0	3	0	0	0	0	0	0.1	3	0.1	0.5	0
CVSD0056	38	0.5	0.1	0.1	0	0	0	0	0	0	0	0	0.5	0	0	38	0.1	0.1	0.1	0	0	0	0.5	0.1	0	0	0	0	0	0	0	0	0	0.1	0	0	0	0	0	0	0	0	0.1	0	0	3	0	0	0
CVSD0057	15.5	0.1	15.5	0.1	0.1	0	0	3	3	0	0.5	0	0.1	0	0	0	0	0.1	0	0	0.5	0	0.1	0	0	0	0	0.1	0	0	0	0.1	0	0	3	0	0.1	0	3	0	0	0	0	0	0.1	0	0.1	0	0.5
CVSD0058	0.1	63	0	0.1	0.1	0.1	0	15.5	0	0.1	0	3	0	0	0	0.1	0.1	0.1	0	0	0	0.1	0	0	0	0	0	0	0	0	0	0	0	0	0	0	0.1	0	3	0	0	0	0	0	0.1	3	0.1	0	0.5
CVSD0059	15.5	0	38	0.1	3	0	0	0	0	0	0.5	0	3	0	0	3	3	3	3	0.1	3	0.1	0	0.1	0	0	0	0.5	0	0	0	0	0	0	0	0	0	0	0.1	0	0	0	0	0	0	3	0	0	0.1
CVSD0060	0	15.5	0.5	0	0	0	3	0	0	15.5	0	0	0	0	0	0	0	0	0	0	0	0	0	0	0	0	0	0	0	0	0	0	0	0	0	0	15.5	0	0	0	0	0	0	0	0	0	0	0	0
CVSD0061	0	3	0.1	3	38	3	38	0	0	15.5	0.5	0	0	0	0	0	0	0	0	0	0	0	3	0	0	0	0	0	0	0	0	0	0	0	0	0	15.5	0	0	0	0	0	0	0	0	0	0	0	0
CVSD0062	0	0.1	0	0	0	0.1	0.1	0	0	15.5	0	0	0	0	0	0	0	0	0	0	0	0	0	0	0	0	0	0	0	0	0	0	0	0	0	0	15.5	0	0	0	0	0	0	0	0	0	0	0	0
CVSD0063	0	0	0	0	0.1	3	3	0	0	63	0	0.1	0	0	0.1	0	0	0	0	0	0	0	0.1	0	0	0	0	0	0	0	0	0	0	0	0	0	0.1	0	0	0	0	0	0	0	0	0	0	0	0
CVSD0064	0	0.1	0	0	0.5	0	0.1	0	0	63	0.1	0	0	0	0	0	0	0	0	0	0	0	0	0	0	0	0	0	0	0	0	0	0	0	0	0	0	0	0	0	0	0	0	0	0	0	0	0	0
CVSD0065	0	0.5	0.5	0	0	38	0.5	0	0	0.1	0.5	0	0	0	0.1	0	0	0	0	0	0	0	0	0	0	0	0	0	0	0	0	0	0	0	0	0	0.1	0	0	0	0	0	0	0	0	0	0	0	0
CVSD0066	0	0	0.5	0.5	0.1	3	3	0	0.5	38	0	3	0	0	0	0	0	0	0	0	0	0	0.1	0	0	0	0	0	0	0	0	0	0	0	0	0	0.1	0	0	0	0	0	0	0	0	0	0	0	0
CVSD0067	0	0	3	0	0.1	15.5	3	0	0.5	38	0	0	0	0	0.1	0	0	0	0	0	0	0	0	0	0	0	0	0	0.5	0	0	0	0	0	0	0	3	0	0	0	0	0	0	0	0	0	0	0	0
CVSD0068	0	3	0	0	0	3	3	0	0	38	0	0	0	0	0.5	0	0	0	0	0	0	0	0	0	0	0	0	0	0.1	0	0	0	0	0	0	0	0.1	0	0	0	0.5	0	0	0	0	0	0	0	0
CVSD0069	0	0	0	0	0.5	38	0.1	0	0	0.1	0	0	0	0	0.5	0	0	0	0	0	0	0	0	0	0	0	0	0	0	0	0	0	0	0	0	0	63	0	0	0	0	0	0	0	0	0	0	0	0
CVSD0070	0	0.1	0.1	0	0.1	0	0	0	0	3	0	0	0	0	0	0	0	0	0	0	0	0	0	0	0	0	0	0	0	0	0	0	0	0	0	0	0	0	0	0	0	0	0	0	0	0	0	0	0
CVSD0071	0	0.1	0.1	0	0	3	0.1	0	0	15.5	0	0	0	0	0	0	0	0	0	0	0	0	3	0	0	0	0	0	0	0	0	0	0	0	0	0	0.1	0	0	0.1	0	0	0	0	0	0	0	0	0
CVSD0072	0	0.1	0	0	0	0.1	0.1	0	0	15.5	0	0	0	0	0	0	0	0	0	0	0	0	0.1	0	0	0	0	0	0	0	0	0	0	0	0	0	3	0	0	0	0	0	0	0	0	0	0	0	0
CVSD0073	0	0.1	0.5	0	0.5	3	15.5	0	0	38	0.5	0	0	0	0.1	0	0	0	0	0	0	0	0	0	0	0	0	0	0	0	0	0	0	0	0	0	38	0	0	0	0	0	0	0	0	0	0	0	0
CVSD0074	0	3	0	0	3	0	3	0	0	15.5	0.1	0	0	0	0	0	0	0	0	0	0	0	0.1	0	0	0	0	0	0	0	0	0	0	0	0	0	15.5	0	0	0	0	0	0	0	0	0	0	0	0
CVSD0075	0	0	0	0	0	15.5	0.1	0	0	38	0	0	0	0	0	0	0	0	0	0	0	0	0	0	0	0	0	0	0.1	0	0	0	0	0	0	0	0	0	0	0	0	0	0	0	0	0	0	0	0
CVSD0076	0	0.1	0	0	0.5	0.1	3	0	0	63	0	0	0	0	0.1	0	0	0	0	0	0	0	0	0	0	0	0	0	0	0	0	0	0	0	0	0	0.1	0	0	0	0.1	0	0	0	0	0	0	0	0
CVSD0077	0	0	0	0	0	0.5	3	0	0	0.1	0	0	0	0	0	0	0	0	0	0	0	0	0	0	0	0	0	0	0	0	0	0	0	0	0	0	0	0	0	0	0	0	0	0	0	0	0	0	0
CVSD0078	0	0	0	0	0	0.1	0	0	0	15.5	0	0	0	0	3	0	0	0	0	0	0	0	0.5	0	0	0	0	0	0	0	0	0	0	0	0	0	3	0	0	0	0	0	0	0	0	0	0	0	0
CVSD0079	0	0	0	0	0	0.5	0	0	0	63	0	0	0	0	0	0	0	0	0	0	0	0	0	0	0	0	0	0	0.5	0	0	0	0	0	0	0	0	0	0	0	0	0	0	0	0	0	0	0	0
CVSD0080	0	3	0	0	0.1	15.5	3	0	0	0.1	0	0	0	0	0	0	0	0	0	0	0	0	0	0	0	0	0	0	0	0	0	0	0	0	0	0	0.1	0	0	0	0	0	0	0	0	0	0	0	0
CVSD0081	0	0.1	0	0	0	0.5	0	0	0	0.1	0	0	0	0	0.1	0	0	0	0	0	0	0	0	0	0	0	0	0	0	0	0	0	0	0	0	0	3	0	0	0	0.5	0	0	0	0	0	0	0	0
CVSD0082	0	0.1	0	0	0	0	0	0	0	0	0	0	0	0	0.1	0	0	0	0	0	0	0	0	0	0	0	0	0	0	0	0	0	0	0	0	0	3	0	0	3	0	0	0	0	0	0	0	0	0
CVSD0083	0	0.1	0	0	0	0.1	0	0	0.5	0	0	0	0	0	0	0	0	0	0	0	0	0	0	0	0	0	0	0	0	0	0	0	0	0	0	0	0.1	0	0	0	0.1	0	0	0	0	0	0	0	0
CVSD0084	0	0	0	0	0	0	0	0	0	0.1	0	0	0	0	0	0	0	0	0	0	0	0	0	0	0	0	0	0	0	0	0	0	0	0	0	0	0.1	0	0	0	0.1	0	0	0	0	0	0	0	0
CVSD0085	0	0.1	0	0	0	3	0.5	0	0.1	0.1	0	0	0	0	0	0	0	0	0	0	0	0	0	0	0	0	0	0	0.1	0	0	0	0	0	0	0	0.1	0	0	0.5	0	0	0	0	0	0	0	0	0
CVSD0086	0	0	0	0	0	3	0	0	0.1	3	0	0	0	0	0	0	0	0	0	0	0	0	0	0	0	0	0	0	0.1	0	0	0	0	0	0	0	3	0	0	0	0	0	0	0	0	0	0	0	0
CVSD0087	0	0	0	0	0	3	0	0	0.1	15.5	0	0	0	0	0	0	0	0	0	0	0	0	0	0	0	0	0	0	0.1	0	0	0	0	0	0	0	0.1	0	0	0	0	0	0	0	0	0	0	0	0
CVSD0088	0	0.1	0.5	0	0	3	0.1	0	0	38	0.1	0	0	0	0.1	0	0	0	0	0	0	0	0	0	0	0	0	0	0.1	0	0	0	0	0	0	0	0.1	0	0	0.1	0.1	0	0	0	0	0	0	0	0
CVSD0089	0	0.1	0	0	0	0.1	0	0	0.5	3	0	0	0	0	0	0	0	0	0	0	0	0	0	0	0	0	0	0	0.1	0	0	0	0	0	0	0	0.1	0	0	0	0.5	0	0	0	0	0	0	0	0
CVSD0090	0	0.5	0	0	0	3	0	0	0	0.1	0	0	0	0	0.1	0	0	0	0	0	0	0	0	0	0	0	0	0	0.1	0	0	0	0	0	0	0	0.1	0	0	0	0.5	0	0	0	0	0	0	0	0
CVSD0091	0	0.1	0.5	0	0	3	0.1	0	0	15.5	0	0	0	0	0	0	0	0	0	0	0	0	0	0	0	0	0	0	0.1	0	0	0	0	0	0	0	0.1	0	0	0	0.1	0	0	0	0	0	0	0	0
CVSD0092	0	3	0	0	0	3	0	0	0	0.1	0	0	0	0	0	0	0	0	0	0	0	0	0	0	0	0	0	0	0.5	0	0	0	0	0	0	0	0	0	0	0	0	0	0	0	0	0	0	0	0
CVSD0093	0	0	3	0	0	0.1	0	0	0	0	0	0	0	0	0	0	0	0	0	0	0	0	0	0	0	0	0	0	0.1	0	0	0	0	0	0	0	0	0	0	0	0.1	0	0	0	0	0	0	0	0
CVSD0094	0	0.1	0	0	0	15.5	0	0	0	3	0	0	0	0	0	0	0	0	0	0	0	0	0	0	0	0	0	0	0	0	0	0	0	0	0	0	15.5	0	0	0	3	0	0	0	0	0	0	0	0
CVSD0095	0	0.1	0	0	0	15.5	0	0	0	0.1	0	0	0	0	0	0	0	0	0	0	0	0	0.5	0	0	0	0	0	0.5	0	0	0	0	0	0	0	0	0	0	0	0.5	0	0	0	0	0	0	0	0
CVSD0096	0	3	0	0	0	3	0.1	0	0	0.5	0	0	0	0	0	0	0	0	0	0	0	0	0	0	0	0	0	0	0	0	0	0	0	0	0	0	0	0	0	0	0.5	0	0	0	0	0	0	0	0
CVSD0097	0	0.1	0	0	0	0.1	0	0	0	38	0	0.5	0	0	0	0	0	0	0	0	0	0	0	0	0	0	0	0	0.1	0	0	0	0	0	0	0	3	0	0	0	0	0	0	0	0	0	0	0	0
CVSD0098	0	0.5	0	0	0	0.1	0	0	0	0.1	0	0	0	0	0	0	0	0	0	0	0	0	0	0	0	0	0	0	3	0	0	0	0	0	0	0	0.1	0	0	0	0.1	0	0	0	0	0	0	0	0
CVSD0099	0	0.5	0	0	0.5	3	0	0	0	0	0	0	0	0	0.1	0	0	0	0	0	0	0	0	0	0	0	0	0	0	0	0	0	0	0	0	0	0	0	0	0	0	0	0	0	0	0	0	0	0
CVSD0100	0	0.1	0	0	0	0	0	0	0	0.1	0	0	0	0	0	0	0	0	0	0	0	0	0	0	0	0	0	0	0	0	0	0	0	0	0	0	0.5	0	0	0	0	0	0	0	0	0	0	0	0
CVSD0101	0	0	0	0	3	3	0	0	0	0	0	0	0	0	0	0	0	0	0	0	0	0	0	0	0	0	0	0	0.5	0	0	0	0	0	0	0	0	0	0	0	0	0	0	0	0	0	0	0	0
CVSD0102	0	0	0	0	0	3	0	0	0	3	0	0	0	0	0	0	0	0	0	0	0	0	0	0	0	0	0	0	0	0	0	0	0	0	0	0	0	0	0	0	0	0	0	0	0	0	0	0	0
CVSD0103	0	3	0	0	0	0.1	0.5	0	0	15.5	0	0	0	0	0	0	0	0	0	0	0	0	0	0	0	0	0	0	0	0	0	0	0	0	0	0	0.1	0	0	0	0	0	0	0	0	0	0	0	0
CVSD0104	0	0.1	0	0	0	3	0	0	0	0	0	0	0	0	0.1	0	0	0	0	0	0	0	0	0	0	0	0	0	0.5	0	0	0	0	0	0	0	0	0	0	0	0	0	0	0	0	0	0	0	0
CVSD0105	0	0.1	0	0	0	15.5	0	0	0	63	0.1	0	0	0	0.5	0	0	0	0	0	0	0	0	0	0	0	0	0	0.5	0	0	0	0	0	0	0	0.1	0	0	0	0	0	0	0	0	0	0	0	0
CVSD0106	0	0.1	0	0	0	3	0	0	0.1	0.1	0	0	0	0	0	0	0	0	0	0	0	0	0	0	0	0	0	0	0.1	0	0	0	0	0	0	0	0.1	0	0	0	0.5	0	0	0	0	0	0	0	0
CVSD0107	0	0.1	0	0	0	3	0	0	0	3	0	0	0	0	0	0	0	0	0	0	0	0	0	0	0	0	0	0	0	0	0	0	0	0	0	0	0.1	0	0	0	0	0	0	0	0	0	0	0	0
CVSD0108	0	0.1	0	0	0	3	0	0	0.1	0.1	0	0	0	0	0.1	0	0	0	0	0	0	0	0	0	0	0	0	0	0.1	0	0	0	0	0	0	0	0.1	0	0	0	0	0	0	0	0	0	0	0	0
CVSD0109	0	0.1	0	0	0	15.5	0	0	0	3	0	0	0	0	0	0	0	0	0	0	0	0	0	0	0	0	0	0	0	0	0	0	0	0	0	0	0	0	0	0	0	0	0	0	0	0	0	0	0
CVSD0110	0	0	0.1	0	0	0	0	0	0	3	0	0	0	0	0	0	0	0	0	0	0	0	0	0	0	0	0	0	0	0	0	0	0	0	0	0	0	0	0	0	0	0	0	0	0	0	0	0	0
CVSD0111	0	0	0.1	0	0	0	0	0	0	3	0	0	0	0	3	0	0	0	0	0	0	0	0	0	0	0	0	0	3	0	0	0	0	0	0	0	0	0	0	0	0	0	0	0	0	0	0	0	0
CVSD0112	0	0	0	0	0	3	0	0	0	15.5	0	0	0	0	0.1	0	0	0	0	0	0	0	0	0	0	0	0	0	0	0	0	0	0	0	0	0	0	0	0	0	0	0	0	0	0	0	0	0	0
CVSD0113	0	0	0	0	0	0	0	0	0	3	0	0	0	0	0	0	0	0	0	0	0	0	0	0	0	0	0	0	0	0	0	0	0	0	0	0	0	0	0	0	0	0	0	0	0	0	0	0	0
CVSD0114	0	0	0	0	0	0	0	0	0	3	0	0	0	0	0	0	0	0	0	0	0	0	0	0	0	0	0	0	0	0	0	0	0	0	0	0	0	0	0	0	0	0	0	0	0	0	0	0	0
CVSD0115	0	3	0	0	0	15.5	0	0	0	3	0	0	0	0	0	0	0	0	0	0	0	0	0	0	0	0	0	0	0	0	0	0	0	0	0	0	0.1	0	0	0	0.5	0	0	0	0	0	0	0	0
CVSD0116	0	0.1	0	0	0	3	0	0	0	0.1	0	0	0	0	0	0	0	0	0	0	0	0	0	0	0	0	0	0	0.1	0	0	0	0	0	0	0	0.1	0	0	0	0	0	0	0	0	0	0	0	0
CVSD0117	0	0	0	0	0	0.1	0	0	0	0.1	0	0	0	0	0	0	0	0	0	0	0	0	0	0	0	0	0	0	0.5	0	0	0	0	0	0	0	0	0	0	0	0	0	0	0	0	0	0	0	0
CVSD0118	0	0.1	0	0	0	0	0	0	0.1	3	0	0.5	0	0	0	0	0	0	0	0	0	0	0	0	0	0	0	0	0	0	0	0	0	0	0	0	0.1	0	0	0	0.1	0	0	0	0	0	0	0	0
CVSD0119	0	0	0	0	0	0	0	0	0	0	0	0	0	0	0	0	0	0	0	0	0	0	0	0	0	0	0	0	0	0	0	0	0	0	0	0	0	0	0	0	0	0	0	0	0	0	0	0	0
CVSD0120	0	3	0	0	0	0.1	0	0	0	0.1	0	0	0	0	0.1	0	0	0	0	0	0	0	0	0	0	0	0	0	0	0	0	0	0	0	0	0	0	0	0	0	0	0	0	0	0	0	0	0	0
CVSD0121	0	0.1	0	0	0	0	0	0	0	0	0	0	0	0	0.1	0	0	0	0	0	0	0	0	0	0	0	0	0	0	0	0	0	0	0	0	0	0.1	0	0	0	0	0	0	0	0	0	0	0	0
CVSD0122	0	0	0	0	0	0	0	0	0	0	0	0	0	0	0	0	0	0	0	0	0	0	0	0	0	0	0	0	0	0	0	0	0	0	0	0	0	0	0	0	0	0	0	0	0	0	0	0	0
CVSD0123	0	0	0	0	0	0	0	0	0	0	0	0	0	0	0	0	0	0	0	0	0	0	0	0	0	0	0	0	0	0	0	0	0	0	0	0	0.1	0	0	0	0	0	0	0	0	0	0	0	0
CVSD0124	0	0.1	0	0	0	0	0	0	0	0	0	0	0	0	0	0	0	0	0	0	0	0	0	0	0	0	0	0	0	0	0	0	0	0	0	0	3	0	0	0	0	0	0	0	0	0	0	0	0
CVSD0125	0	0.1	0	0	0	38	0	0	0	0	0	0	0	0	0	0	0	0	0	0	0	0	0	0	0	0	0	0	0	0	0	0	0	0	0	0	15.5	0	0	0	0	0	0	0	0	0	0	0	0
CVSD0126	0	3	0	0	0	0.1	0	0	0	0	0	0	0	0	0.1	0	0	0	0	0	0	0	0	0	0	0	0	0	0	0	0	0	0	0	0	0	15.5	0	0	0	0	0	0	0	0	0	0	0	0
CVSD0127	0	0.1	0	0	0	0.1	0	0	0.1	0	0	0	0	0	0	0	0	0	0	0	0	0	0	0	0	0	0	0	0	0	0	0	0	0	0	0	3	0	0	0	0	0	0	0	0	0	0	0	0
CVSD0128	0	3	0	0	0	0	0	0	0	0.5	0	0	0	0	0	0	0	0	0	0	0	0	0	0	0	0	0	0	0	0	0	0	0	0	0	0	3	0	0	0	0	0	0	0	0	0	0	0	0
CVSD0129	0	0.5	0	0	0	0	0	0	0	0.1	0	0	0	0	0	0	0	0	0	0	0	0	0	0	0	0	0	0	0	0	0	0	0	0	0	0	0.1	0	0	0	0	0	0	0	0	0	0	0	0
CVSD0130	0	0.1	0	0	0	0	0	0	0	0	0	0	0	0	0	0	0	0	0	0	0	0	0	0	0	0	0	0	0	0	0	0	0	0	0	0	0.1	0	0	0	0	0	0	0	0	0	0	0	0
CVSD0131	0	0.1	0	0	0	0	0	0	0	0	0	0	0	0	0	0	0	0	0	0	0	0	0	0	0	0	0	0	0	0	0	0	0	0	0	0	0.1	0	0	0	0	0	0	0	0	0	0	0	0
CVSD0132	0	0	0	0	0	0	0	0	0	0	0	0	0	0	0	0	0	0	0	0	0	0	0	0	0	0	0	0	0	0	0	0	0	0	0	0	0	0	0	0	0	0	0	0	0	0	0	0	0
CVSD0133	0	0.1	0	0	0	0	0	0	0	0	0	0	0	0	0	0	0	0	0	0	0	0	0	0	0	0	0	0	0	0	0	0	0	0	0	0	0	0	0	0	0	0	0	0	0	0	0	0	0
CVSD0134	0	0	0	0	0	0	0	0	0	0.5	0	0	0	0	0	0	0	0	0	0	0	0	0	0	0	0	0	0	0	0	0	0	0	0	0	0	0.1	0	0	0	0	0	0	0	0	0	0	0	0
CVSD0135	0	0.1	0	0	0	0.1	0	0	0	0.5	0	0	0	0	0.1	0	0	0	0	0	0	0	0	0	0	0	0	0	0	0	0	0	0	0	0	0	0.1	0	0	0	0	0	0	0	0	0	0	0	0
CVSD0136	0	0	0	0	0	0	0	0	0	15.5	0	0	0	0	3	0	0	0	0	0	0	0	0	0	0	0	0	0	0	0	0	0	0	0	0	0	3	0	0	0	0	0	0	0	0	0	0	0	0
CVSD0137	0	0	0	0	0	0	0	0	0	3	0.1	0	0	0	15.5	0	0	0	0	0	0	0	0	0	0	0	0	0	0	0	0	0	0	0	0	0	15.5	0	0	0	0	0	0	0	0	0	0	0	0
CVSD0138	0	0.5	0	0	0	0	0	0	0	15.5	0	0	0	0	0.1	0	0	0	0	0	0	0	0	0	0	0	0	0	0	0	0	0	0	0	0	0	3	0	0	0	0	0	0	0	0	0	0	0	0
CVSD0139	0	3	0	0	3	0.5	0	0	0	15.5	0	0	0	0	15.5	0	0	0	0	0	0	0	0	0	0	0	0	0	0	0	0	0	0	0	0	0	15.5	0	0	0	0	0	0	0	0	0	0	0	0
CVSD0140	0	0	0	0	0	0	0	0	0	0.1	0	0	0	0	0	0	0	0	0	0	0	0	0	0	0	0	0	0	0	0	0	0	0	0	0	0	38	0	0	0	0	0	0	0	0	0	0	0	0
CVSD0141	0	0	0	0	0	0	0	0	0.1	15.5	0	0	0	0	0.5	0	0	0	0	0	0	0	0	0	0	0	0	0	0	0	0	0	0	0	0	0	0	0	0	0	0	0	0	0	0	0	0	0	0
CVSD0142	0	0	0	0	0	0	0	0	0	0.1	0	0	0	0	0.1	0	0	0	0	0	0	0	0	0	0	0	0	0	0	0	0	0	0	0	0	0	0.1	0	0	0	0	0	0	0	0	0	0	0	0
CVSD0143	0	0.5	0	0	0	0	0	0	0.1	15.5	0	0	0	0	0	0	0	0	0	0	0	0	0	0	0	0	0	0	0	0	0	0	0	0	0	0	0.1	0	0	0	0	0	0	0	0	0	0	0	0
CVSD0144	0	0	0	0	0	0	0	0	0	15.5	0	0	0	0	15.5	0	0	0	0	0	0	0	0	0	0	0	0	0	0	0	0	0	0	0	0	0	3	0	0	0	0	0	0	0	0	0	0	0	0
CVSD0145	0	0	0	0	0	0	0	0	0	3	0	0	0	0	0	0	0	0	0	0	0	0	0	0	0	0	0	0	0	0	0	0	0	0	0	0	0	0	0	0	0	0	0	0	0	0	0	0	0
CVSD0146	0	0	0	0	0	0	0	0	0	15.5	0	0	0	0	0	0	0	0	0	0	0	0	0	0	0	0	0	0	0	0	0	0	0	0	0	0	3	0	0	0	0	0	0	0	0	0	0	0	0
CVSD0147	0	0	0	0	0	0	15.5	0	0	15.5	0	0	0	0	0.1	0	0	0	0	0	0	0	0	0	0	0	0	0	0	0	0	0	0	0	0	0	3	0	0	0	0	0	0	0	0	0	0	0	0
CVSD0148	0	0.1	0	0	0	0	0	0	0	15.5	0	0.1	0	0	0	0	0	0	0	0	0	0	0	0	0	0	0	0	0	0	0	0	0	0	0	0	0	0	0	0	0	0	0	0	0	0	0	0	0
CVSD0149	0	0	0	0	0	0	0	0	0	15.5	0	0	0	0	0	0	0	0	0	0	0	0	0	0	0	0	0	0	0	0	0	0	0	0	0	0	3	0	0	0	0	0	0	0	0	0	0	0	0
CVSD0150	0	0	0	0	0	0	0	0	0	3	0	0	0	0	0.1	0	0	0	0	0	0	0	0	0	0	0	0	0	0	0	0	0	0	0	0	0	0.1	0	0	0	0	0	0	0	0	0	0	0	0
CVSD0151	0	0.5	0	0	0	0	0.1	0	0	63	0	0	0	0	0.5	0	0	0	0	0	0	0	0	0	0	0	0	0	0	0	0	0	0	0	0	0	0	0	0	0	0	0	0	0	0	0	0	0	0
CVSD0152	0	0.1	0	0	0	0	0.5	0	0	38	0.1	3	0	0	0.1	0	0	0	0	0	0	0	0	0	0	0	0	0	0	0	0	0	0	0	0	0	0	0	0	0	0	0	0	0	0	0	0	0	0
CVSD0153	0	0	0	0	0.5	0	0	0	0	38	0.5	0.1	0	0	0	0	0	0	0	0	0	0	0	0	0	0	0	0	0	0	0	0	0	0	0	0	0	0	0	0	0	0	0	0	0	0	0	0	0
CVSD0154	0	0.1	0	0	0	0	0.5	0	0	38	0	0.1	0	0	0.1	0	0	0	0	0	0	0	0	0	0	0	0	0	0.1	0	0	0	0	0	0	0	0	0	0	0	0	0	0	0	0	0	0	0	0
CVSD0155	0	0	0	0	0	0	0	0	0	63	0.5	3	0	0	0.1	0	0	0	0	0	0	0	0	0	0	0	0	0	0	0	0	0	0	0	0	0	0.1	0	0	0	0	0	0	0	0	0	0	0	0
CVSD0156	0	0.5	0	0	0	0	0.5	0	0	3	0.5	3	0	0	0.1	0	0	0	0	0	0	0	0	0	0	0	0	0	0	0	0	0	0	0	0	0	0.5	0	0	0	0	0	0	0	0	0	0	0	0
CVSD0213	0	1	0	0	0	0	0	0	0	10	0	0	0	0	0	0	0	0	0	0	0	0	0	0	0	0	0	0	0	0	0	0	0	0	0	0	0	0	0	0	0	0	0	0	0	0	0	0	0
CVSD0214	0	8	0	0	0	1	0	0	0	5	0	0	0	0	0	0	0	0	0	0	0	0	0	0	0	0	0	0	0	0	0	0	0	0	0	0	0	0	0	0	0	0	0	0	0	0	0	0	0
CVSD0215	0	2	0	0.1	3	1	0	0	0	0	0	0	0	0	0	0	0	0	0	0	0	0	0	0	0	0	0	0	0	0	0	0	0	0	0	0	5	0	0	0	0	0	0	0	0	0	0	0	0
CVSD0216	0	1	0	0	0.1	1	0	0	0	0.1	0	0	0	0	0	0	0	0	0	0	0	0	0.1	0	0	0	0	0	0	0	0	0	0	0	0	0	0.1	0	0	0	0	0	0	0	0	0	0	0	0
CVSD0217	0	3	0	0	0	1	0	0	0	10	0	0	0	0	0	0	0	0	0	0	0	0	0	0	0	0	0	0	0	0	0	0	0	0	0	0	0	0	0	0	0	0	0	0	0	0	0	0	0
CVSD0218	0	3	0	0	3	3	0	0	0	0.1	0	0	0	0	0	0	0	0	0	0	0	0	0.1	0	0	0	0	0	0	0	0	0	0	0	0	0	5	0	0	0	0	0	0	0	0	0	0	0	0
CVSD0219	0	0	0	0	0	5	0	0	0	30	0	0	0	0	0	0	0	0	0	0	0	0	0	0	0	0	0	0	0	0	0	0	0	0	0	0	0	0	0	0	0	0	0	0	0	0	0	0	0
CVSD0220	0	0	0	0	0.1	0.1	0	0	0	0.1	0	0.1	0	0	0	0	0	0	0	0	0	0	0	0	0	0	0	0	0	0	0	0	0	0	0	0	5	0	0	0	0	0	0	0	0	0	0	0	0
CVSD0221	0	0.1	0	0	0	1	0	0	0	2	0	0.1	0	0	0	0	0	0	0	0	0	0	0.1	0	0	0	0	0	0	0	0	0	0	0	0	0	0.1	0	0	0	0	0	0	0	0	0	0	0	0
CVSD0222	0	50	0	0	12	3	0	0	0	8	0	0	0	0	0	0	0	0	0	0	0	0	25	0	0	0	0.1	0	0	0	0	0	0	0	0	0	5	0	0	0	0.1	0	0	0	0	0	0	0	0
CVSD0223	75	15	0	1	0	0	0	0	0	0	0	0.1	0	3	0	0	0	0	0	0	0	0	5	0	0	0	0	0	0	0	0	0.1	0	0	0	0	10	0	0	0	0.1	0	0	0	0	0	0	0	0
CVSD0224	0	0	0	0	0	0	0	0	0	0	0	0	0	0	15	0	0	0	0	0	0	0	0	0	0	0	0	0	0	0	0	0	0	0	0	0	0	0	0	0	0	0	0	0	0	0	0	0	0
CVSD0225	0	0.1	0	0	0	0	0	0	0	3	0	0	0	0	0	0	0	0	0	0	0	0	0	0	0	0	0	0	0	0	0	0	0	0	0	0	0	0	0	0	0	0	0	0	0	0	0	0	0
CVSD0226	0	0	0	0	0	0	5	0	0	3	0	0	0	0	0	0	0	0	0	0	0	0	0	0	0	0	0	0	0	0	0	0	0	0	0	0	0	0	0	0	0	0	0	0	0	0	0	0	0
CVSD0227	0	0.1	0	0	0	0	0	0	0	8	0	0	0	0	0	0	0	0	0	0	0	0	0	0	0	0	0	0	0	0	0	0	0	0	0	0	0	0	0	0	0	0	0	0	0	0	0	0	0
CVSD0228	0	0	0	0	0	0	0	0	0	0	0	0	0	0	0	0	0	0	0	0	0	0	3	0	0	0	0	0	0	0	0	0	0	0	0	0	0	0	0	0	0	0	0	0	0	0	0	0	0
CVSD0229	0	0	0	0.1	0	0	0	0	2	0	0	0	0	0	0	0	0	0	0	0	0	0	0	0	0	0	0	0	0	0	0	0	0	0	0	0	40	0	0	0	0	0	0	0	0	0	0	0	0
CVSD0230	0	0.1	0	0	0	0	0	0	0	8	0	0	0	0	0	0	0	0	0	0	0	0	0	0	0	0	0	0	0	0	0	0	0	0	0	0	0	0	0	0	0	0	0	0	0	0	0	0	0
CVSD0231	0	0.1	0	0	0	5	1	0	0	15	0	0.1	0	0	0	0	0	0	0	0	0	0	0	0	0	0	0	0	0	0	0	0	0	0	0	0	0	0	0	0	0	0	0	0	0	0	0	0	0
CVSD0232	0	0	0	0	0	0	0	0	0	3	0	0	0	0	0	0	0	0	0	0	0	0	0	0	0	0	0	0	0	0	0	0	0	0	0	0	0	0	0	0	0	0	0	0	0	0	0	0	0
CVSD0233	0	3	0	0	0	10	0	0	0	8	0	0	0	0	0	0	0	0	0	0	0	0	0.1	0	0	0	0	0	0	0	0	0	0	0	0	0	0	0	0	0	0	0	0	0	0	0	0	0	0
CVSD0234	85	0	0	1	10	0	0	0	0.1	0	0	0	0	0	0	0	5	0	0	0	0	0	0	0	0	0	0	0	0	0	0	0.1	0	0	0	0	5	0	0	0	0.1	0	0	0	0	0	0	0	0
CVSD0235	80	3	0	3	5	0.1	0	0	0.1	0	0	0.1	0	0	0	0	5	0	0	0	0	0	0	0	0	0	0	0	0	0	0	1	0	0	0	5	5	0	0	0	1	0	0	0	0	0	0	0	0
CVSD0236	0	3	0	0	3	5	0.1	0	0	0	0	0	0	0	0	0	0	0	0	0	0	0	3	0	0	0	0	0	0	0	0	0	0	0	0	0	3	0	0	0	0.1	0	0	0	0	0	0	0	0
CVSD0237	0	3	0	0	0.1	1	10	0	0	0	0	0	0	0	0	0	0	0	0	0	0	0	0	0	0	0	0	0	0	0	0	0	0	0	0	3	0	0	0	0	0	0	0	0	0	0	0	0	0
CVSD0238	0	5	0	3	8	0.1	3	0	0	0	0.1	0	0	0	0	0	0	0	0	0	0	0	0	0	0	0	0	0	0	0	0	0	0	0	0	5	5	0	0	0	0	0	0	0	0	0	0	0	0
CVSD0239	0	5	0	0	3	1	3	0	0	0	0	0	0	0	0	0	0	0	0	0	0	0	3	0	0	0	0	0	0	0	0	0	0	0	0	3	15	0	0	0	0	0	0	0	0	0	0	0	0
CVSD0240	0	5	0	0	3	1	10	0	0	25	0.1	0	0	0	0	0	0	0	0	0	0	0	5	0	0	0	0	0	0	0	0	0	0	0	0	3	0	0	0	0	0	0	0	0	0	0	0	0	0
CVSD0241	0	5	0	1	3	0	0	0	0	5	3	0	0	0	0	0	0	0	0	0	0	0	0	0	0	0	0	0	0	0	0	0	0	0	0	0	5	0	0	0	0	0	0	0	0	0	0	0	0
CVSD0242	0	0	0	0	0.1	0	0	0	0	10	0	0	0	0	0	0	0	0	0	0	0	0	0	0	0	0	0	0	0	0	0	0	0	0	0	0	5	0	0	0	0	0	0	0	0	0	0	0	0
CVSD0243	0	0	0	0	0	3	2	0	0	3	0	0.1	0	0	0	0	0	0	0	0	0	0	0	0	0	0	0	0	0	0	0	0	0	0	0	0	0	0	0	0	0	0	0	0	0	0	0	0	0
CVSD0244	0	2	0	3	0	0	40	0	0	15	0	0	0	0	0	0	0	0	0	0	0	0	0	0	0	0	0	0	0	0	5	0	0	0	0	0	0	0	0	0	0	0	0	0	0	0	0	0	0
CVSD0245	60	25	0	5	10	0	0	0	0	0	0	0	0	0	0	0	3	0	3	0	0	0	0	0	0	0	0	0	0	0	5	0	0	0	0	3	3	0	0	0	0	0	5	0	0.1	0	0	0	0
CVSD0246	50	5	0	5	3	0	0	0	0	0	0	0	0	0	0	0	3	0	5	0	0	0	3	0	0	0	0	0	0	0	10	2	0	0	0	5	0.1	0	0	0	0	0	10	0	0.1	0	0	0	0
CVSD0247	0	5	0	3	0	0	15	0	0.1	0	0	0	0	0	0	0	1	0	0	0	0	0	0	0	0	0	0	0	0	0	0	0	0	0	0	8	0	0	0	0	0	0	0	0	0	0	0	0	0
CVSD0248	0	10	0	0	2	0	0	0	0.1	0	0	0	0	0	0	0	0	0	0	0	0	0	0	0	0	0	0	0	0	0	0	0	0	0	0	3	5	0	0	0	1	0	0	0	0	0	0	0	0
CVSD0249	0	5	0	0.1	0.1	0	0	0	0	0	0	0	0	0.1	0	0	0	0	0	0	0	0	0	0	0	0	0	0	0	0	0	0	0	0	0	0	3	0	0	0	0	0	0	0	0	0	0	0	0
CVSD0250	3	2	0	0	1	0	0	0	0	0	0	0	0	0.1	0	0	0	0	0	0	0	0	0	0	0	0	0	0	0	0	0	0	0	0	0	0	20	0	0	0	0.1	0	0	0	0	0	0	0	0
CVSD0251	10	3	0	0.1	40	0	1	0	0	0.1	0	0	0	2	0.1	0	0	0	0	0	0	5	0	0	0	0	0	0	0	0	0.1	0.1	0	0	0	1	60	0	0	0	10	0	0	0	0	0	0	0	0
CVSD0252	15	8	0	1	60	0	0.1	0	0	0	0	0	0	0	0	0	0	0	0	0	0	2	0	0	0	0	0	0	0	0	3	0	0	0	0	0	25	0	0	0	0.1	0	0	0	0	0	0	0	0
CVSD0253	0	8	0	0	0	0	5	0	0	0	0	0	0	0	0	0	0	0	0	0	0	0	0	0	0	0	0	0	0	0	0	0	0	0	0	0	10	0	0	0	0	0	0	0	0	0	0	0	0
CVSD0254	0	5	0	0	0	0	0	0	0	40	0	0	0	0	0	0	0	0	0	0	0	0	0	0	0	0	0	0	0	0	0.1	0	0	0	0	0.1	10	0	0	0	0	0	0	0	0	0	0	0	0
CVSD0255	0	5	0	3	0	0	3	0	0	0	0	0	0	0	0	0	0	0	0	0	0	0	0	0	0	0	0	0	0	0	0	0	0	0	0	0	8	0	0	0	0	0	0	0	0	0	0	0	0
CVSD0256	5	5	0	1	40	0	0	0	0	0	0	0	0	0	0	0	5	0	0	0	0	3	0	0	0	0	0	0	0	0	1	0	0	0	0	0	10	0	0	0	0	0	0	0	0	0	0	0.1	0
CVSD0257	0	5	0	3	0	1	3	0	0	30	0	0	0	0	0	0	0	0	0	0	0	0	0	0	0	0	0	0	0	0	0	0	0	0	0	0	1	0	0	0	0	0	0	0	0	0	0	0	0
CVSD0258	5	10	0	0.1	0.1	3	5	0	0	30	0	0	0	0	10	0	0	0	0	0	0	0	0	0	0	0	0	0	0	0	0	0	0	0	0	0	5	0	0	0	0	0	0	0	0	0	0	0	0
CVSD0259	0.1	10	0	1	10	1	15	0	0	3	0	0	0	0	1	0	0.1	0	0	0	0	0	0	0	0	0	0	0	0	0	1	0	0	0	0	0.1	3	0	0	0	0	0	0	0	0	0	0	0	0
CVSD0260	0	0	0	0	0.1	1	5	0	0	5	0	0	0	0	0	0	0	0	0	0	0	0	0	0	0	0	0	0	0	0	0	0	0	0	0	0	5	0	0	0	0	0	0	0	0	0	0	0	0
CVSD0261	0	10	0	0.1	1	3	3	0	0	5	0	0	0	0	0	0	0	0	0	0	0	0	0	0	0	0	0	0	0	0	0	0	0	0	0	0.1	15	0	0	0	0	0	0	0	0	0	0	0	0
CVSD0262	0.1	8	0	0	0.1	1	10	0	0	0	0	0	0	0	0	0	0	0	0	0	0	0	0	0	0	0	0	0	0	0	0	0	0	0	0	1	0	0	0	0	0	0	0	0	0	0	0	0	0
CVSD0263	10	10	0	5	50	0	0.1	0	0	0	0	0	0	0	3	0	5	0	0	0	0	15	0	0	0	0	0	0	0	0	8	0	0	0	0	1	3	0	0	0	0.1	0	0	0	0.1	0	0	0	0
CVSD0264	15	20	0	1	5	0	0.1	0	0	0	0	0	0	0	15	0	1	0	0	0	0	0	0	0	0	0	0	0	0	0	5	0	0	0	0	3	0.1	0	0	0	0.1	0	3	0	0.1	0	0	0	0
CVSD0265	30	15	0	5	50	0	3	0	0	0	0	0	0	0	0	0	10	0	0	0	0	5	0	0	0	0	0	0	0	0	5	0.1	0	0	0	5	0	0	0	0	0	0	5	0	0.1	0	0	0.1	0
CVSD0266	5	15	0	3	40	0	0	0	0	0.1	0	0	0	0	3	1	2	0	0	0	0	10	0	0	0	0	0	0	0	0	0	1	0	0	0	2	25	0	0	0	0	0	0	0	0.1	0	0	1	0
CVSD0267	0	0	0	0	0	1	0	0	0	3	0	0	0	0	0	0	0	0	0	0	0	0	0	0	0	0	0	0	0	0	0	0	0	0	0	0	0	0	0	0	0	0	0	0	0	0	0	0	0
CVSD0268	0	0	0	0	0	0	3	0	0	0	0	0	0	0	0	0	0	0	0	0	0	0	0	0	0	0	0	0	0	0	0	0	0	0	0	0	0	0	0	0	0	0	0	0	0	0	0	0	0
CVSD0269	0	0	0	0	3	0	38	0	0	0	0	0	0	0	88	0	0	0	0	0	0	0	0	0	0	0	0	0	0	0	0	0	0	0	0	38	13	0	0	0	0	0	0	0	0	0	0	0	0
CVSD0270	0	0	3	0	0	0	13	0	0	38	0	0	0	0	3	0	0	0	0	0	0	0	0	0	0	0	3	0	0	0	0	0	0	0	0	3	3	0	0	0	0	0	0	0	0	0	0	0	0
CVSD0271	0	0	88	0	0	0	0	0	0	0	0	0	0	0	3	0	0	0	0	0	0	0	0	0	0	0	3	0	0	0	0	0	0	0	0	0	88	0	0	0	0	0	0	0	0	0	0	0	0
CVSD0272	0	0	0	0	0	0	13	0	0	0	0	0	0	0	0	0	38	0	0	0	0	68	0	0	0	0	0	0	0	0	0	0	0	0	0	3	88	0	0	0	0	0	0	0	0	0	0	0	0
CVSD0273	0	0	0	0	0	0	3	0	0	3	0	0	0	0	0	0	0	0	0	0	0	0	0	0	0	0	0	0	0	0	0	0	0	0	0	0	0	0	0	0	0	0	0	0	0	0	0	0	0
CVSD0274	0	0	0	0	0	0	0	0	0	0	0	0	0	0	0	0	0	0	0	0	0	0	0	0	0	0	0	0	0	0	0	0	0	0	0	0	3	0	0	0	0	0	0	0	0	0	0	0	0
CVSD0275	0	0	0	0	38	13	3	0	0	88	0	3	0	0	3	0	0	0	0	0	0	13	0	0	0	0	0	0	0	0	0	0	0	0	0	0	38	0	0	0	0	0	0	0	0	0	0	0	0
CVSD0276	0	0	0	0	0	0	0	0	0	0	0	0	0	0	0	0	0	0	0	0	0	0	0	0	0	0	0	0	0	0	0	0	0	0	0	0	0	0	0	0	0	0	0	0	0	0	0	0	0
CVSD0277	0	0	0	0	0	0	3	0	0	0	0	0	0	0	68	0	0	0	0	0	0	0	0	0	0	0	0	0	0	0	0	0	0	0	0	0	0	0	0	0	0	0	0	0	0	0	0	0	0
CVSD0278	0	0	13	0	0	13	3	0	0	0	0	0	0	0	3	0	13	0	0	0	0	3	0	0	0	0	0	0	0	0	0	0	0	0	0	3	38	0	0	0	0	0	0	0	0	0	0	0	0
CVSD0279	0	0	0	0	13	3	13	0	0	0	0	0	0	0	0	0	0	0	0	0	0	0	0	0	0	0	0	0	0	0	0	0	0	0	0	3	13	0	0	0	0	0	0	0	0	0	0	0	0
CVSD0280	0	0	3	3	88	0	0	0	0	0	0	0	0	0	0	0	3	0	0	0	0	13	0	38	0	0	0	0	0	0	38	0	0	0	0	3	13	0	0	0	0	0	0	0	0	0	0	0	0
CVSD0281	0	0	0	0	0	68	13	0	0	0	0	0	0	0	0	0	0	0	0	0	0	0	0	0	0	0	0	0	0	0	0	0	0	0	0	3	3	0	0	0	0	3	0	0	0	0	0	0	0
CVSD0282	0	0	38	0	88	0	0	0	0	0	0	0	0	0	0	0	3	0	0	0	0	3	0	3	0	0	0	0	0	0	3	0	0	0	0	3	13	0	0	0	0	0	0	0	0	0	0	0	0
CVSD0283	0	0	13	0	13	0	0	0	0	38	0	0	0	0	13	0	3	0	0	0	0	13	0	0	0	0	0	0	0	0	0	0	0	0	0	3	3	0	3	0	0	0	0	0	0	0	0	0	0
CVSD0285	0	0	0	0	0	0	38	0	0	0	0	0	0	0	0	0	0	0	0	0	0	0	0	0	0	0	0	0	0	0	0	0	0	0	0	0	0	0	0	0	0	0	0	0	0	0	0	0	0
CVSD0286	0	0	0	0	0	3	3	0	0	88	0	0	0	0	0	0	0	0	0	0	0	0	0	0	0	0	0	0	0	0	0	0	0	0	0	3	3	0	0	0	0	0	0	0	0	0	0	0	0
CVSD0288	0	0	13	0	13	3	3	0	0	0	0	0	0	0	3	0	13	0	0	0	0	3	0	0	0	0	3	0	0	0	0	0	0	0	0	13	3	0	0	0	0	0	0	0	0	0	0	0	0
CVSD0289	0	0	0	0	0	0	0	0	0	0	0	0	0	0	0	0	0	0	0	0	0	0	0	0	0	0	0	0	0	0	0	0	0	0	0	0	0	0	0	0	0	0	0	0	0	0	0	0	0
CVSD0291	0	0	0	0	0	0	3	0	0	68	0	0	0	0	0	0	0	0	0	0	0	0	0	0	0	0	0	0	0	0	0	0	0	0	0	0	13	0	0	0	0	0	0	0	0	0	0	0	0
CVSD0292	0	0	3	0	13	0	13	0	0	3	0	0	0	0	3	0	3	0	0	0	0	13	0	0	0	0	0	0	0	0	13	0	0	0	0	13	88	0	0	0	0	0	0	0	0	0	0	0	0
CVSD0293	0	0	88	0	38	0	0	0	0	0	0	0	0	0	0	0	68	0	0	0	0	38	0	3	0	0	0	0	0	0	13	0	0	0	0	0	0	0	0	0	0	0	0	0	0	0	0	0	0
CVSD0294	0	0	0	0	0	0	0	0	0	0	0	0	0	0	3	0	0	0	0	0	0	0	0	0	0	0	0	0	0	0	0	0	0	0	0	0	3	0	0	0	0	3	0	0	0	0	0	0	0
CVSD0295	0	0	3	0	3	38	3	0	0	0	0	0	0	0	13	0	3	0	0	0	0	0	0	0	0	0	0	0	0	0	0	0	0	0	0	0	68	0	0	0	0	0	0	0	0	0	0	0	0
CVSD0296	0	0	13	0	88	0	0	0	0	0	0	0	0	0	0	0	3	0	0	0	0	13	0	0	0	0	0	0	0	0	3	0	0	0	0	0	0	0	0	0	0	0	0	0	0	0	0	0	0
CVSD0297	0	0	0	0	0	0	13	0	0	0	0	0	0	0	3	0	0	0	0	0	0	0	0	0	0	0	0	0	0	0	0	0	0	0	0	0	0	0	0	0	0	0	0	0	0	0	0	0	0
CVSD0298	0	0	0	0	0	0	0	0	0	0	0	0	0	0	0	0	0	0	0	0	0	13	0	0	0	0	3	0	0	0	13	0	0	0	0	0	0	0	0	0	0	0	0	0	0	0	0	0	0
CVSD0299	0	0	68	0	68	0	0	0	0	0	0	0	0	0	0	0	3	0	0	0	0	0	0	0	0	0	0	0	0	0	13	88	0	0	0	0	0	0	0	0	0	0	0	0	0	0	0	0	0
CVSD0300	0	0	0	0	3	0	3	0	0	0	0	0	0	0	0	0	0	0	0	0	0	0	0	0	0	0	0	0	0	0	3	0	0	0	0	13	38	0	0	0	0	0	0	0	0	0	0	0	0
CVSD0301	0	0	0	0	0	0	0	0	0	0	0	0	0	0	0	0	0	0	0	0	0	0	0	0	0	0	0	0	0	0	0	0	0	0	0	0	0	0	0	0	0	0	0	0	0	0	0	0	0
CVSD0302	0	0	38	0	68	3	3	0	0	0	3	0	0	3	0	0	3	0	0	0	0	3	0	0	0	0	0	0	0	0	0	68	0	0	0	3	13	0	0	0	0	0	0	0	0	0	0	0	0
CVSD0303	0	0	0	0	0	0	3	0	0	13	0	0	0	0	3	0	0	0	0	0	0	3	0	0	0	0	0	0	0	0	0	0	0	0	0	0	0	0	0	0	0	0	0	0	0	0	0	0	0
CVSD0305	0	0	0	0	88	0	0	0	0	0	0	0	0	13	0	0	38	0	0	0	0	0	0	0	0	0	0	0	0	0	0	0	0	0	0	0	0	0	88	0	0	0	0	0	0	0	0	0	0
CVSD0306	0	0	68	0	38	0	0	0	0	0	0	0	0	0	0	0	13	0	0	0	0	0	0	0	0	0	0	0	0	0	13	38	0	0	0	3	0	0	13	0	0	0	0	0	0	0	0	0	0
CVSD0307	0	0	3	0	88	0	0	0	0	0	0	0	0	0	0	0	13	0	0	0	0	13	0	38	0	0	0	0	0	0	0	13	0	0	0	13	13	0	0	0	0	0	0	0	0	0	0	0	0
CVSD0308	0	0	68	0	3	0	0	0	0	0	0	0	0	0	0	0	38	0	0	0	0	0	0	0	0	0	0	0	0	0	38	3	0	0	0	0	0	0	0	0	0	0	13	0	0	0	0	0	0
CVSD0310	0	0	88	0	88	0	0	0	0	0	0	0	0	3	0	0	3	0	0	0	0	38	0	13	0	0	0	0	0	0	38	13	0	0	0	0	0	0	0	0	0	0	0	0	0	0	0	0	0
CVSD0311	0	0	0	0	0	0	0	0	0	0	0	0	0	0	0	0	0	0	0	0	0	0	0	0	0	0	0	0	0	0	0	0	0	0	0	0	0	0	0	0	0	0	0	0	0	0	0	0	0
CVSD0312	0	0	0	0	0	15	2	0	0.1	0	0	0	0	0	0	0	0	0	0	0	0	0	0	0	0	0	0	0	0	0	0	0	0	0	0	15	0	0	0	0	0	0	0	0	0	0	0	0	0
CVSD0313	0	0	0	0	0	0	0	0	0	1	0	0	0	0	5	0	0	0	0	0	0	0	0	0	0	0	0	0	0	0	0	0	0	0	0	0	0	0	0	0	0	0	0	0	0	0	0	0	0
CVSD0314	85	0	0	1	0	0	0	0	0	0	0	0	0	0	0	0	0	0	0	0	0	0	0	0	0	0	0	0	0	0	0	0	0	0	0	0	0	0	0	0	0	0	0	0	0	0	0	0	0
CVSD0315	50	10	0	3	0	0	0	0	0	0	0	0	0	0	0	0	0	0	0	0	0	0	0	0	0	0	0	0	0	0	0	0	0	0	0	0	0	0	0	0	0	0	0	0	0	0	0	0	0
CVSD0316	35	10	0	6	10	0	0	0	0	0	0	0	0	0	0	0	0	0	0	0	0	0	0	0	0	0	0	0	0	0	0	0	0	0	0	0	0	0	0	0	0.5	0	0	0	0	0	0	0	0
CVSD0317	80	0.5	0	0.5	0	0	0	0	0	0	0	0	0	0	0	0	0	0	0	0	0	0	0	0	0	0	0.5	0	0	0	0	0	0	0	0	0	0	0	8	0	0	0	0	0	0	0	0	0	0
CVSD0318	0	1	0	0	0	0	0	0	2	0.5	0	0	0	0	0	0	0	0	0	0	0	0	0	0	0	0	0	0	0	0	0	0	0	0	0	0	1	0	0	0	0	0	0	0	0	0	0	0	0
CVSD0319	0	10	0	3	0	0	0	0	0	0	0	0	0	0	0	0	0	0	0	0	0	0	20	0	0	0	0	0	0	0	0	0	0	0	0	0	40	0	0	0	0	0	0	0	0	0	0	0	0
CVSD0320	0	8	0	0	0.5	0	0	0	0	15	0	0	0	0	0	0	0	0	0	0	0	0	10	0	0	0	0	0	0	0	0	0	0	0	0	0	0	0	0	0	0	0	0	0	0	0	0	0	0
CVSD0321	0	30	0	0	0	0	0	0	0	10	0	0	0	0	0	0	0	0	0	0	0	0	0	0	0	0	0	0	0	0	0	0	0	0	0	0	15	0	0	0	0	0	0	0	0	0	0	0	0
CVSD0322	0	0.5	0	0	0	0	0	0	0	3	0	0	0	0	0	0	0	0	0	0	0	0	0	0	0	0	0	0	0	0	0	0	0	0	0	0	0	0	0	0	0	0	0	0	0	0	0	0	0
CVSD0323	0	0.5	0	0	0	10	0	0	0	0	0	0	0	0	0	0	0	0	0	0	0	0	0	0	0	0	0	0	0	0	0	0	0	0	0	0	0	0	0	0	0	0	0	0	0	0	0	0	0
CVSD0324	0	0	0	0	0	0	0	0	0	0	0	0	0	0	0	0	0	0	0	0	0	0	0	0	0	0	0	0	0	0	0	0	0	0	0	0	0	0	0	0	0	0	0	0	0	0	0	0	0
CVSD0325	0	5	0	0	0	0	0	0	0	0	0	0	0	0	0	0	0	0	0	0	0	0	0	0	0	0	0	0	0	0	0	0	0	0	0	0	0	0	0	0	0	0	0	0	0	0	0	0	0
CVSD0326	0	15	0	0	0.5	0	0	0	0	0	0	0	0	0	0	0	0	0	0	0	0	0	0	0	0	0	0	0	0	0	0	0	0	0	0	0	0	0	0	0	0.5	0	0	0	0	0	0	0	0
CVSD0327	0	2	0	0	0	0	0	0	0	30	0	0	0	0	0	0	0	0	0	0	0	0	0.5	0	0	0	0	0	0	0	0	0	0	0	0	0	0	0	0	0	0.5	0	0	0	0	0	0	0	0
CVSD0328	0	0	0	0	0	0	0	0	0	2	0	0	0	0	0	0	0	0	0	0	0	0	0	0	0	0	0	0	0	0	0	0	0	0	0	0	0	0	0	0	0	0	0	0	0	0	0	0	0
CVSD0329	0	0	0	0	0	0	0	0	0	0	0	0	0	0	0	0	0	0	0	0	0	0	0	0	0	0	0	0	0	0	0	0	0	0	0	0	0	0	0	0	0	0	0	0	0	0	0	0	0
CVSD0330	0	0	0	0	0	0	0	0	0	0	0	0	0	0	0	0	0	0	0	0	0	0	0	0	0	0	0	0	0	0	0	0	0	0	0	0	0	0	0	0	0	0	0	0	0	0	0	0	0
CVSD0331	0	2	0	0	0	0	0	0	0	0	0	0	0	0	0	0	0	0	0	0	0	0	0	0	0	0	0	0	0	0	0	0	0	0	0	0	0	0	0	0	0	0	0	0	0	0	0	0	0
[truncated: 491 more columns]

## Sheet: Site data
plot_id	source	place	biome	lat	long	plot_size_sqm	plot_side_m
CVSD0018	Van der Merwe (1976)	Goukamma	Thicket	-34.0484	22.8595	100	10
CVSD0019	Van der Merwe (1976)	Goukamma	Thicket	-34.0559	22.9256	100	10
CVSD0020	Van der Merwe (1976)	Goukamma	Thicket	-34.0501	22.8784	100	10
CVSD0021	Van der Merwe (1976)	Goukamma	Thicket	-34.0354	22.8595	100	10
CVSD0022	Van der Merwe (1976)	Goukamma	Thicket	-34.0578	22.8922	100	10
CVSD0023	Van der Merwe (1976)	Goukamma	Thicket	-34.062	22.9174	100	10
CVSD0024	Van der Merwe (1976)	Goukamma	Thicket	-34.0785	22.9543	100	10
CVSD0025	Van der Merwe (1976)	Goukamma	Thicket	-34.0455	22.8385	100	10
CVSD0026	Van der Merwe (1976)	Goukamma	Thicket	-34.0455	22.8422	100	10
CVSD0027	Van der Merwe (1976)	Goukamma	Thicket	-34.0461	22.8442	100	10
CVSD0028	Van der Merwe (1976)	Goukamma	Thicket	-34.0461	22.8485	100	10
CVSD0029	Van der Merwe (1976)	Goukamma	Thicket	-34.0474	22.8472	100	10
CVSD0030	Van der Merwe (1976)	Goukamma	Thicket	-34.0487	22.8613	100	10
CVSD0031	Van der Merwe (1976)	Goukamma	Thicket	-34.0491	22.8631	100	10
CVSD0032	Van der Merwe (1976)	Goukamma	Thicket	-34.0495	22.8612	100	10
CVSD0033	Van der Merwe (1976)	Goukamma	Thicket	-34.0493	22.8649	100	10
CVSD0034	Van der Merwe (1976)	Goukamma	Thicket	-34.0502	22.8628	100	10
CVSD0035	Van der Merwe (1976)	Goukamma	Thicket	-34.0503	22.8646	100	10
CVSD0036	Van der Merwe (1976)	Goukamma	Thicket	-34.0513	22.8672	100	10
CVSD0037	Van der Merwe (1976)	Goukamma	Thicket	-34.0522	22.8704	100	10
CVSD0038	Van der Merwe (1976)	Goukamma	Thicket	-34.0542	22.8767	100	10
CVSD0039	Van der Merwe (1976)	Goukamma	Thicket	-34.0521	22.8767	100	10
CVSD0040	Van der Merwe (1976)	Goukamma	Thicket	-34.0605	22.9018	100	10
CVSD0041	Van der Merwe (1976)	Goukamma	Thicket	-34.0622	22.9059	100	10
CVSD0042	Van der Merwe (1976)	Goukamma	Thicket	-34.0647	22.9209	100	10
CVSD0043	Van der Merwe (1976)	Goukamma	Thicket	-34.0642	22.9352	100	10
CVSD0044	Van der Merwe (1976)	Goukamma	Thicket	-34.0638	22.9124	100	10
CVSD0045	Van der Merwe (1976)	Goukamma	Thicket	-34.0646	22.917	100	10
CVSD0046	Van der Merwe (1976)	Goukamma	Thicket	-34.0628	22.9312	100	10
CVSD0047	Van der Merwe (1976)	Goukamma	Thicket	-34.0653	22.9304	100	10
CVSD0048	Van der Merwe (1976)	Goukamma	Thicket	-34.0628	22.9329	100	10
CVSD0049	Van der Merwe (1976)	Goukamma	Thicket	-34.0342	22.8616	100	10
CVSD0050	Van der Merwe (1976)	Goukamma	Thicket	-34.033	22.8603	100	10
CVSD0051	Van der Merwe (1976)	Goukamma	Thicket	-34.0625	22.936	100	10
CVSD0052	Van der Merwe (1976)	Goukamma	Thicket	-34.0609	22.9366	100	10
CVSD0053	Van der Merwe (1976)	Goukamma	Thicket	-34.033	22.8581	100	10
CVSD0054	Van der Merwe (1976)	Goukamma	Thicket	-34.0332	22.8556	100	10
CVSD0055	Van der Merwe (1976)	Goukamma	Thicket	-34.0446	22.8665	100	10
CVSD0056	Van der Merwe (1976)	Goukamma	Thicket	-34.0629	22.9346	100	10
CVSD0057	Van der Merwe (1976)	Goukamma	Thicket	-34.043	22.8616	100	10
CVSD0058	Van der Merwe (1976)	Goukamma	Thicket	-34.05	22.8824	100	10
CVSD0059	Van der Merwe (1976)	Goukamma	Thicket	0	0	100	10
CVSD0060	Van der Merwe (1976)	Goukamma	Fynbos	-34.0332	22.8525	100	10
CVSD0061	Van der Merwe (1976)	Goukamma	Fynbos	-34.0484	22.8786	100	10
CVSD0062	Van der Merwe (1976)	Goukamma	Fynbos	-34.0633	22.925	100	10
CVSD0063	Van der Merwe (1976)	Goukamma	Fynbos	-34.0476	22.853	100	10
CVSD0064	Van der Merwe (1976)	Goukamma	Fynbos	-34.0474	22.8554	100	10
CVSD0065	Van der Merwe (1976)	Goukamma	Fynbos	0	0	100	10
CVSD0066	Van der Merwe (1976)	Goukamma	Fynbos	-34.0493	22.871	100	10
CVSD0067	Van der Merwe (1976)	Goukamma	Fynbos	-34.0499	22.8762	100	10
CVSD0068	Van der Merwe (1976)	Goukamma	Fynbos	-34.051	22.8794	100	10
CVSD0069	Van der Merwe (1976)	Goukamma	Fynbos	-34.0652	22.9284	100	10
CVSD0070	Van der Merwe (1976)	Goukamma	Fynbos	-34.0543	22.9365	100	10
CVSD0071	Van der Merwe (1976)	Goukamma	Fynbos	-34.0636	22.9372	100	10
CVSD0072	Van der Merwe (1976)	Goukamma	Fynbos	-34.0784	22.9663	100	10
CVSD0073	Van der Merwe (1976)	Goukamma	Fynbos	NA	NA	100	10
CVSD0074	Van der Merwe (1976)	Goukamma	Fynbos	NA	NA	100	10
CVSD0075	Van der Merwe (1976)	Goukamma	Fynbos	-34.0443	22.8401	100	10
CVSD0076	Van der Merwe (1976)	Goukamma	Fynbos	-34.0369	22.8638	100	10
CVSD0077	Van der Merwe (1976)	Goukamma	Fynbos	-34.0703	22.9602	100	10
CVSD0078	Van der Merwe (1976)	Goukamma	Fynbos	-34.0457	22.8686	100	10
CVSD0079	Van der Merwe (1976)	Goukamma	Fynbos	-34.0515	22.9033	100	10
CVSD0080	Van der Merwe (1976)	Goukamma	Fynbos	-34.0463	22.8514	100	10
CVSD0081	Van der Merwe (1976)	Goukamma	Fynbos	-34.043	22.8709	100	10
CVSD0082	Van der Merwe (1976)	Goukamma	Fynbos	-34.0483	22.8827	100	10
CVSD0083	Van der Merwe (1976)	Goukamma	Fynbos	-34.0316	22.8646	100	10
CVSD0084	Van der Merwe (1976)	Goukamma	Fynbos	-34.0529	22.9244	100	10
CVSD0085	Van der Merwe (1976)	Goukamma	Fynbos	-34.0523	22.8884	100	10
CVSD0086	Van der Merwe (1976)	Goukamma	Fynbos	-34.0567	22.9227	100	10
CVSD0087	Van der Merwe (1976)	Goukamma	Fynbos	-34.0541	22.922	100	10
CVSD0088	Van der Merwe (1976)	Goukamma	Fynbos	-34.0546	22.8989	100	10
CVSD0089	Van der Merwe (1976)	Goukamma	Fynbos	-34.0478	22.8708	100	10
CVSD0090	Van der Merwe (1976)	Goukamma	Fynbos	-34.0478	22.8686	100	10
CVSD0091	Van der Merwe (1976)	Goukamma	Fynbos	-34.0419	22.8761	100	10
CVSD0092	Van der Merwe (1976)	Goukamma	Fynbos	-34.0385	22.8593	100	10
CVSD0093	Van der Merwe (1976)	Goukamma	Fynbos	-34.0409	22.8599	100	10
CVSD0094	Van der Merwe (1976)	Goukamma	Fynbos	-34.0452	22.8541	100	10
CVSD0095	Van der Merwe (1976)	Goukamma	Fynbos	-34.0451	22.8572	100	10
CVSD0096	Van der Merwe (1976)	Goukamma	Fynbos	-34.0466	22.8564	100	10
CVSD0097	Van der Merwe (1976)	Goukamma	Fynbos	-34.0481	22.882	100	10
CVSD0098	Van der Merwe (1976)	Goukamma	Fynbos	-34.0378	22.8538	100	10
CVSD0099	Van der Merwe (1976)	Goukamma	Fynbos	-34.0605	22.9347	100	10
CVSD0100	Van der Merwe (1976)	Goukamma	Fynbos	-34.0554	22.9148	100	10
CVSD0101	Van der Merwe (1976)	Goukamma	Fynbos	-34.0552	22.9119	100	10
CVSD0102	Van der Merwe (1976)	Goukamma	Fynbos	-34.0529	22.9082	100	10
CVSD0103	Van der Merwe (1976)	Goukamma	Fynbos	-34.0508	22.9004	100	10
CVSD0104	Van der Merwe (1976)	Goukamma	Fynbos	-34.0508	22.8909	100	10
CVSD0105	Van der Merwe (1976)	Goukamma	Fynbos	-34.0523	22.8856	100	10
CVSD0106	Van der Merwe (1976)	Goukamma	Fynbos	-34.0504	22.8856	100	10
CVSD0107	Van der Merwe (1976)	Goukamma	Fynbos	NA	NA	100	10
CVSD0108	Van der Merwe (1976)	Goukamma	Fynbos	-34.048	22.8727	100	10
CVSD0109	Van der Merwe (1976)	Goukamma	Fynbos	-34.0481	22.8747	100	10
CVSD0110	Van der Merwe (1976)	Goukamma	Fynbos	-34.0446	22.878	100	10
CVSD0111	Van der Merwe (1976)	Goukamma	Fynbos	-34.0404	22.8748	100	10
CVSD0112	Van der Merwe (1976)	Goukamma	Fynbos	-34.0386	22.8742	100	10
CVSD0113	Van der Merwe (1976)	Goukamma	Fynbos	-34.0415	22.8642	100	10
CVSD0114	Van der Merwe (1976)	Goukamma	Fynbos	-34.0425	22.8641	100	10
CVSD0115	Van der Merwe (1976)	Goukamma	Fynbos	-34.04	22.8633	100	10
CVSD0116	Van der Merwe (1976)	Goukamma	Fynbos	-34.0382	22.8623	100	10
CVSD0117	Van der Merwe (1976)	Goukamma	Fynbos	NA	NA	100	10
CVSD0118	Van der Merwe (1976)	Goukamma	Fynbos	NA	NA	100	10
CVSD0119	Van der Merwe (1976)	Goukamma	Fynbos	NA	NA	100	10
CVSD0120	Van der Merwe (1976)	Goukamma	Fynbos	-34.0556	22.9356	100	10
CVSD0121	Van der Merwe (1976)	Goukamma	Fynbos	-34.0571	22.9355	100	10
CVSD0122	Van der Merwe (1976)	Goukamma	Fynbos	-34.0562	22.9316	100	10
CVSD0123	Van der Merwe (1976)	Goukamma	Fynbos	-34.058	22.9317	100	10
CVSD0124	Van der Merwe (1976)	Goukamma	Fynbos	-34.0571	22.9301	100	10
CVSD0125	Van der Merwe (1976)	Goukamma	Fynbos	-34.0555	22.9293	100	10
CVSD0126	Van der Merwe (1976)	Goukamma	Fynbos	-34.0587	22.9257	100	10
CVSD0127	Van der Merwe (1976)	Goukamma	Fynbos	-34.0598	22.9257	100	10
CVSD0128	Van der Merwe (1976)	Goukamma	Fynbos	-34.0551	22.9219	100	10
CVSD0129	Van der Merwe (1976)	Goukamma	Fynbos	-34.0521	22.9004	100	10
CVSD0130	Van der Merwe (1976)	Goukamma	Fynbos	-34.0611	22.9255	100	10
CVSD0131	Van der Merwe (1976)	Goukamma	Fynbos	NA	NA	100	10
CVSD0132	Van der Merwe (1976)	Goukamma	Fynbos	NA	NA	100	10
CVSD0133	Van der Merwe (1976)	Goukamma	Fynbos	NA	NA	100	10
CVSD0134	Van der Merwe (1976)	Goukamma	Fynbos	NA	NA	100	10
CVSD0135	Van der Merwe (1976)	Goukamma	Fynbos	-34.0484	22.8804	100	10
CVSD0136	Van der Merwe (1976)	Goukamma	Fynbos	-34.0343	22.8579	100	10
CVSD0137	Van der Merwe (1976)	Goukamma	Fynbos	-34.064	22.931	100	10
CVSD0138	Van der Merwe (1976)	Goukamma	Fynbos	NA	NA	100	10
CVSD0139	Van der Merwe (1976)	Goukamma	Fynbos	-34.0746	22.9521	100	10
CVSD0140	Van der Merwe (1976)	Goukamma	Fynbos	-34.0539	22.8925	100	10
CVSD0141	Van der Merwe (1976)	Goukamma	Fynbos	-34.0522	22.8832	100	10
CVSD0142	Van der Merwe (1976)	Goukamma	Fynbos	-34.0495	22.8799	100	10
CVSD0143	Van der Merwe (1976)	Goukamma	Fynbos	-34.0437	22.8605	100	10
CVSD0144	Van der Merwe (1976)	Goukamma	Fynbos	-34.0345	22.8518	100	10
CVSD0145	Van der Merwe (1976)	Goukamma	Fynbos	-34.036	22.8539	100	10
CVSD0146	Van der Merwe (1976)	Goukamma	Fynbos	-34.0366	22.8582	100	10
CVSD0147	Van der Merwe (1976)	Goukamma	Fynbos	-34.0357	22.8625	100	10
CVSD0148	Van der Merwe (1976)	Goukamma	Fynbos	-34.0436	22.8561	100	10
CVSD0149	Van der Merwe (1976)	Goukamma	Fynbos	-34.064	22.9329	100	10
CVSD0150	Van der Merwe (1976)	Goukamma	Fynbos	-34.0651	22.9321	100	10
CVSD0151	Van der Merwe (1976)	Goukamma	Fynbos	-34.0472	22.8587	100	10
CVSD0152	Van der Merwe (1976)	Goukamma	Fynbos	-34.0663	22.9385	100	10
CVSD0153	Van der Merwe (1976)	Goukamma	Fynbos	NA	NA	100	10
CVSD0154	Van der Merwe (1976)	Goukamma	Fynbos	NA	NA	100	10
CVSD0155	Van der Merwe (1976)	Goukamma	Fynbos	-34.0681	22.9289	100	10
CVSD0156	Van der Merwe (1976)	Goukamma	Fynbos	-34.0714	22.952	100	10
CVSD0213	Grobler (Unpublished)	Brandfontein	Fynbos	-34.7669	19.8767	25	5
CVSD0214	Grobler (Unpublished)	Brandfontein	Fynbos	-34.7665	19.877	25	5
CVSD0215	Grobler (Unpublished)	Brandfontein	Fynbos	-34.7655	19.8777	25	5
CVSD0216	Grobler (Unpublished)	Brandfontein	Fynbos	-34.7647	19.8981	25	5
CVSD0217	Grobler (Unpublished)	Brandfontein	Fynbos	-34.7653	19.9031	25	5
CVSD0218	Grobler (Unpublished)	Brandfontein	Fynbos	-34.765	19.9036	25	5
CVSD0219	Grobler (Unpublished)	Brandfontein	Fynbos	-34.7655	19.9023	25	5
CVSD0220	Grobler (Unpublished)	Brandfontein	Fynbos	-34.7645	19.887	25	5
CVSD0221	Grobler (Unpublished)	Brandfontein	Fynbos	-34.7664	19.8853	25	5
CVSD0222	Grobler (Unpublished)	Brandfontein	Thicket	-34.7655	19.9013	100	10
CVSD0223	Grobler (Unpublished)	Brandfontein	Thicket	-34.765	19.8869	100	10
CVSD0224	Grobler (Unpublished)	Denel OTR	Fynbos	-34.5081	20.4418	25	5
CVSD0225	Grobler (Unpublished)	Denel OTR	Fynbos	-34.5603	20.4043	25	5
CVSD0226	Grobler (Unpublished)	Denel OTR	Fynbos	-34.5189	20.4319	25	5
CVSD0227	Grobler (Unpublished)	Denel OTR	Fynbos	-34.6388	20.2385	25	5
CVSD0228	Grobler (Unpublished)	Denel OTR	Fynbos	-34.6237	20.2584	25	5
CVSD0229	Grobler (Unpublished)	Denel OTR	Fynbos	-34.6157	20.287	25	5
CVSD0230	Grobler (Unpublished)	Denel OTR	Fynbos	-34.6152	20.2785	25	5
CVSD0231	Grobler (Unpublished)	Denel OTR	Fynbos	-34.5994	20.3334	25	5
CVSD0232	Grobler (Unpublished)	Denel OTR	Fynbos	-34.5973	20.3269	25	5
CVSD0233	Grobler (Unpublished)	Denel OTR	Fynbos	-34.5949	20.3254	25	5
CVSD0234	Grobler (Unpublished)	Denel OTR	Thicket	-34.6234	20.2594	100	10
CVSD0235	Grobler (Unpublished)	Denel OTR	Thicket	-34.559	20.4039	100	10
CVSD0236	Grobler (Unpublished)	Geelkrans	Fynbos	-34.357	21.4691	25	5
CVSD0237	Grobler (Unpublished)	Geelkrans	Fynbos	-34.3641	21.4766	25	5
CVSD0238	Grobler (Unpublished)	Geelkrans	Fynbos	-34.3648	21.4894	25	5
CVSD0239	Grobler (Unpublished)	Geelkrans	Fynbos	-34.3637	21.485	25	5
CVSD0240	Grobler (Unpublished)	Geelkrans	Fynbos	-34.3636	21.4831	25	5
CVSD0241	Grobler (Unpublished)	Geelkrans	Fynbos	-34.3648	21.481	25	5
CVSD0242	Grobler (Unpublished)	Geelkrans	Fynbos	-34.3637	21.4821	25	5
CVSD0243	Grobler (Unpublished)	Geelkrans	Fynbos	-34.3656	21.476	25	5
CVSD0244	Grobler (Unpublished)	Geelkrans	Fynbos	-34.3657	21.4705	25	5
CVSD0245	Grobler (Unpublished)	Geelkrans	Thicket	-34.3654	21.4811	100	10
CVSD0246	Grobler (Unpublished)	Geelkrans	Thicket	-34.3635	21.4733	100	10
CVSD0247	Grobler (Unpublished)	Hartenbos	Fynbos	-34.1104	22.1203	25	5
CVSD0248	Grobler (Unpublished)	Hartenbos	Fynbos	-34.1111	22.1208	25	5
CVSD0249	Grobler (Unpublished)	Hartenbos	Fynbos	-34.1075	22.1217	25	5
CVSD0250	Grobler (Unpublished)	Hartenbos	Fynbos	-34.1092	22.123	25	5
CVSD0251	Grobler (Unpublished)	Hartenbos	Thicket	-34.109	22.1227	100	10
CVSD0252	Grobler (Unpublished)	Hartenbos	Thicket	-34.1087	22.1219	100	10
CVSD0253	Grobler (Unpublished)	Kabeljous	Fynbos	-33.998	24.943	25	5
CVSD0254	Grobler (Unpublished)	Kabeljous	Fynbos	-33.9971	24.9452	25	5
CVSD0255	Grobler (Unpublished)	Kabeljous	Fynbos	-33.9994	24.9405	25	5
CVSD0256	Grobler (Unpublished)	Kabeljous	Thicket	-33.9983	24.9428	100	10
CVSD0257	Grobler (Unpublished)	Vleesbaai	Fynbos	-34.3019	21.9333	25	5
CVSD0258	Grobler (Unpublished)	Vleesbaai	Fynbos	-34.3022	21.9349	25	5
CVSD0259	Grobler (Unpublished)	Vleesbaai	Fynbos	-34.3018	21.9375	25	5
CVSD0260	Grobler (Unpublished)	Vleesbaai	Fynbos	-34.301	21.9354	25	5
CVSD0261	Grobler (Unpublished)	Vleesbaai	Fynbos	-34.2986	21.9382	25	5
CVSD0262	Grobler (Unpublished)	Vleesbaai	Fynbos	-34.2981	21.935	25	5
CVSD0263	Grobler (Unpublished)	Vleesbaai	Thicket	-34.3008	21.9354	100	10
CVSD0264	Grobler (Unpublished)	Vleesbaai	Thicket	-34.3021	21.9321	100	10
CVSD0265	Grobler (Unpublished)	Vleesbaai	Thicket	-34.2981	21.937	100	10
CVSD0266	Grobler (Unpublished)	Gqeberha	Thicket	-34.0124	25.6598	100	10
CVSD0267	Grobler (Unpublished)	Gqeberha	Fynbos	-34.0077	25.6577	25	10
CVSD0268	Cowling (1983)	Cape St Francis	Fynbos	NA	NA	100	NA
CVSD0269	Cowling (1983)	Cape St Francis	Fynbos	NA	NA	100	NA
CVSD0270	Cowling (1983)	Cape St Francis	Fynbos	NA	NA	100	NA
CVSD0271	Cowling (1983)	Cape St Francis	Thicket	NA	NA	100	NA
CVSD0272	Cowling (1983)	Cape St Francis	Fynbos	NA	NA	100	NA
CVSD0273	Cowling (1983)	Cape St Francis	Fynbos	NA	NA	100	NA
CVSD0274	Cowling (1983)	Cape St Francis	Fynbos	NA	NA	100	NA
CVSD0275	Cowling (1983)	Cape St Francis	Fynbos	NA	NA	100	NA
CVSD0276	Cowling (1983)	Cape St Francis	Fynbos	NA	NA	100	NA
CVSD0277	Cowling (1983)	Cape St Francis	Fynbos	NA	NA	100	NA
CVSD0278	Cowling (1983)	Cape St Francis	Fynbos	NA	NA	100	NA
CVSD0279	Cowling (1983)	Cape St Francis	Fynbos	NA	NA	100	NA
CVSD0280	Cowling (1983)	Cape St Francis	Thicket	NA	NA	100	NA
CVSD0281	Cowling (1983)	Cape St Francis	Fynbos	NA	NA	100	NA
CVSD0282	Cowling (1983)	Cape St Francis	Thicket	NA	NA	100	NA
CVSD0283	Cowling (1983)	Cape St Francis	Thicket	NA	NA	100	NA
CVSD0285	Cowling (1983)	Cape St Francis	Fynbos	NA	NA	100	NA
CVSD0286	Cowling (1983)	Cape St Francis	Fynbos	NA	NA	100	NA
CVSD0288	Cowling (1983)	Cape St Francis	Fynbos	NA	NA	100	NA
CVSD0289	Cowling (1983)	Cape St Francis	Fynbos	NA	NA	100	NA
CVSD0291	Cowling (1983)	Cape St Francis	Fynbos	NA	NA	100	NA
CVSD0292	Cowling (1983)	Cape St Francis	Fynbos	NA	NA	100	NA
CVSD0293	Cowling (1983)	Cape St Francis	Thicket	NA	NA	100	NA
CVSD0294	Cowling (1983)	Cape St Francis	Fynbos	-34.1886	24.8439	100	NA
CVSD0295	Cowling (1983)	Cape St Francis	Fynbos	NA	NA	100	NA
CVSD0296	Cowling (1983)	Cape St Francis	Thicket	NA	NA	100	NA
CVSD0297	Cowling (1983)	Cape St Francis	Fynbos	NA	NA	100	NA
CVSD0298	Cowling (1983)	Cape St Francis	Thicket	NA	NA	100	NA
CVSD0299	Cowling (1983)	Cape St Francis	Thicket	NA	NA	100	NA
CVSD0300	Cowling (1983)	Cape St Francis	Fynbos	NA	NA	100	NA
CVSD0301	Cowling (1983)	Cape St Francis	Fynbos	NA	NA	100	NA
CVSD0302	Cowling (1983)	Cape St Francis	Thicket	NA	NA	100	NA
CVSD0303	Cowling (1983)	Cape St Francis	Fynbos	NA	NA	100	NA
CVSD0305	Cowling (1983)	Cape St Francis	Thicket	NA	NA	100	NA
CVSD0306	Cowling (1983)	Cape St Francis	Thicket	-34.1056	24.8764	100	NA
CVSD0307	Cowling (1983)	Cape St Francis	Thicket	NA	NA	100	NA
CVSD0308	Cowling (1983)	Cape St Francis	Thicket	-34.1056	24.8767	100	NA
CVSD0310	Cowling (1983)	Cape St Francis	Thicket	NA	NA	100	NA
CVSD0311	Grobler (Unpublished)	Gqeberha	Fynbos	-34.0566	25.6373	25	5
CVSD0312	Grobler (Unpublished)	Gqeberha	Fynbos	-34.0212	25.6388	25	5
CVSD0313	Grobler (Unpublished)	Gqeberha	Fynbos	-34.0099	25.6562	25	5
CVSD0314	Mergili & Privett (2008)	Grootbos	Thicket	-34.5364	19.4108	50	NA
CVSD0315	Mergili & Privett (2008)	Grootbos	Thicket	-34.5364	19.4108	50	NA
CVSD0316	Mergili & Privett (2008)	Grootbos	Thicket	-34.5364	19.4108	50	NA
CVSD0317	Mergili & Privett (2008)	Grootbos	Thicket	-34.5364	19.4108	50	NA
CVSD0318	Mergili & Privett (2008)	Grootbos	Fynbos	-34.5364	19.4108	50	NA
CVSD0319	Mergili & Privett (2008)	Grootbos	Fynbos	-34.5364	19.4108	50	NA
CVSD0320	Mergili & Privett (2008)	Grootbos	Fynbos	-34.5364	19.4108	50	NA
CVSD0321	Mergili & Privett (2008)	Grootbos	Fynbos	-34.5364	19.4108	50	NA
CVSD0322	Mergili & Privett (2008)	Grootbos	Fynbos	-34.5364	19.4108	50	NA
CVSD0323	Mergili & Privett (2008)	Grootbos	Fynbos	-34.5364	19.4108	50	NA
CVSD0324	Mergili & Privett (2008)	Grootbos	Fynbos	-34.5364	19.4108	50	NA
CVSD0325	Mergili & Privett (2008)	Grootbos	Fynbos	-34.5364	19.4108	50	NA
CVSD0326	Mergili & Privett (2008)	Grootbos	Fynbos	-34.5364	19.4108	50	NA
CVSD0327	Mergili & Privett (2008)	Grootbos	Fynbos	-34.5364	19.4108	50	NA
CVSD0328	Mergili & Privett (2008)	Grootbos	Fynbos	-34.5364	19.4108	50	NA
CVSD0329	Mergili & Privett (2008)	Grootbos	Fynbos	-34.5364	19.4108	50	NA
CVSD0330	Mergili & Privett (2008)	Grootbos	Fynbos	-34.5364	19.4108	50	NA
CVSD0331	Mergili & Privett (2008)	Grootbos	Fynbos	-34.5364	19.4108	50	NA
