# Supplementary material for: The vegetation of Holocene coastal dunes of the Cape south coast, South Africa
Source: PeerJ. 2023 Dec 12;11:e16427. doi: 10.7717/peerj.16427 (PMC10722985; doi:10.7717/peerj.16427)
Supplement: Supplemental Information 6 — Fidelity and frequency of species in dune thicket (DT) and strandveld (SV) units and frequency and average cover for species in Mesic DT, Xeric DT, Grootbos SV, Goukamma SV, St Francis SV, Southwestern SV and Southeastern SV, respectively. [file peerj-11-16427-s006.xlsx]

## Sheet: All_fidelity
	Mesic DT		Xeric DT		Grootbos SV		Goukamma SV		St Francis SV		Southwestern SV		Southeastern SV
releves	60		12		14		97		24		34		12
species	140		141		147		84		156		180		104
	Phi coeff	Freq %	Phi coeff	Freq %	Phi coeff	Freq %	Phi coeff	Freq %	Phi coeff	Freq %	Phi coeff	Freq %	Phi coeff	Freq %
Grewia occidentalis	77.3	63	---	0	---	0	---	0	---	0	---	0	---	0
Behnia reticulata	66.7	48	---	0	---	0	---	0	---	0	---	0	---	0
Secamone alpini	64.2	45	---	0	---	0	---	0	---	0	---	0	---	0
Dovyalis rhamnoides	64.1	53	---	8	---	0	---	0	---	0	---	0	---	0
Gymnosporia buxifolia	54.8	33	---	0	---	0	---	0	---	0	---	0	---	0
Stachys aethiopica	51.8	30	---	0	---	0	---	0	---	0	---	0	---	0
Roepera sessilifolia	51.8	30	---	0	---	0	---	0	---	0	---	0	---	0
Asparagus plumosus	48.7	27	---	0	---	0	---	0	---	0	---	0	---	0
Cynanchum natalitium	45.5	23	---	0	---	0	---	0	---	0	---	0	---	0
Diospyros whyteana	42	20	---	0	---	0	---	0	---	0	---	0	---	0
Allophylus decipiens	42	20	---	0	---	0	---	0	---	0	---	0	---	0
Searsia undulata	42	20	---	0	---	0	---	0	---	0	---	0	---	0
Senecio quinquelobus	40.2	18	---	0	---	0	---	0	---	0	---	0	---	0
Acokanthera oppositifolia	40.2	18	---	0	---	0	---	0	---	0	---	0	---	0
Zanthoxylum capense	34.1	13	---	0	---	0	---	0	---	0	---	0	---	0
Brachiaria chusqueoides	34.1	13	---	0	---	0	---	0	---	0	---	0	---	0
Hypoestes aristata	34.1	13	---	0	---	0	---	0	---	0	---	0	---	0
Apodytes dimidiata	31.9	12	---	0	---	0	---	0	---	0	---	0	---	0
Dioscorea mundii	31.9	12	---	0	---	0	---	0	---	0	---	0	---	0
Amaranthus thunbergii	29.5	10	---	0	---	0	---	0	---	0	---	0	---	0
Sutera griquensis	29.5	10	---	0	---	0	---	0	---	0	---	0	---	0
Droguetia iners	24	7	---	0	---	0	---	0	---	0	---	0	---	0
Searsia longispina	24	7	---	0	---	0	---	0	---	0	---	0	---	0
Stipa dregeana	20.8	5	---	0	---	0	---	0	---	0	---	0	---	0
Canthium spinosum	20.8	5	---	0	---	0	---	0	---	0	---	0	---	0
Leidesia procumbens	20.8	5	---	0	---	0	---	0	---	0	---	0	---	0
Solanum sodomaeodes	20.8	5	---	0	---	0	---	0	---	0	---	0	---	0
Olea europaea	20.8	5	---	0	---	0	---	0	---	0	---	0	---	0
Zantedeschia aethiopica	20.8	5	---	0	---	0	---	0	---	0	---	0	---	0
Cotyledon velutina	20.8	5	---	0	---	0	---	0	---	0	---	0	---	0
Canthium inerme	16.9	3	---	0	---	0	---	0	---	0	---	0	---	0
Senecio angulatus	16.9	3	---	0	---	0	---	0	---	0	---	0	---	0
Capparis sepiaria	16.9	3	---	0	---	0	---	0	---	0	---	0	---	0
Psydrax obovata	16.9	3	---	0	---	0	---	0	---	0	---	0	---	0
Diospyros dichrophylla	16.9	3	---	0	---	0	---	0	---	0	---	0	---	0
Euphorbia triangularis	12	2	---	0	---	0	---	0	---	0	---	0	---	0
Plumbago auriculata	12	2	---	0	---	0	---	0	---	0	---	0	---	0
Asplenium cordatum	12	2	---	0	---	0	---	0	---	0	---	0	---	0
Pelargonium odoratissimum	12	2	---	0	---	0	---	0	---	0	---	0	---	0
Secamone filiformis	12	2	---	0	---	0	---	0	---	0	---	0	---	0
Pulicaria scabra	12	2	---	0	---	0	---	0	---	0	---	0	---	0
Bonatea antennifera	12	2	---	0	---	0	---	0	---	0	---	0	---	0
Urtica dioica	12	2	---	0	---	0	---	0	---	0	---	0	---	0
Diospyros villosa	12	2	---	0	---	0	---	0	---	0	---	0	---	0
Jasminum angulare	12	2	---	0	---	0	---	0	---	0	---	0	---	0
Adenocline acuta	12	2	---	0	---	0	---	0	---	0	---	0	---	0
Searsia rehmanniana	12	2	---	0	---	0	---	0	---	0	---	0	---	0
Ochna serrulata	12	2	---	0	---	0	---	0	---	0	---	0	---	0
Urtica lobulata	12	2	---	0	---	0	---	0	---	0	---	0	---	0
Pupalia lappacea	12	2	---	0	---	0	---	0	---	0	---	0	---	0
Senecio rigidus	12	2	---	0	---	0	---	0	---	0	---	0	---	0
Adiantum aethiopicum	12	2	---	0	---	0	---	0	---	0	---	0	---	0
Euphorbia mammillaris	12	2	---	0	---	0	---	0	---	0	---	0	---	0
Leonotis leonurus	12	2	---	0	---	0	---	0	---	0	---	0	---	0
Haplocarpha lanata	12	2	---	0	---	0	---	0	---	0	---	0	---	0
Celtis africana	12	2	---	0	---	0	---	0	---	0	---	0	---	0
Euphorbia kraussiana	12	2	---	0	---	0	---	0	---	0	---	0	---	0
Asparagus scandens	12	2	---	0	---	0	---	0	---	0	---	0	---	0
Trachyandra divaricata	12	2	---	0	---	0	---	0	---	0	---	0	---	0
Afrocanthium mundianum	12	2	---	0	---	0	---	0	---	0	---	0	---	0
Robsonodendron maritimum	---	7	60.9	67	---	0	---	0	---	13	0.4	15	---	0
Lachenalia bulbifera	---	0	48.9	42	---	0	---	0	---	0	0.6	9	---	8
Didymodoxa capensis	---	0	38.3	17	---	0	---	0	---	0	---	0	---	0
Asparagus setaceus	---	0	38.3	17	---	0	---	0	---	0	---	0	---	0
Zehneria scabra	---	0	38.3	17	---	0	---	0	---	0	---	0	---	0
Haemanthus albiflos	---	0	38.3	17	---	0	---	0	---	0	---	0	---	0
Cineraria geifolia	---	0	34.3	17	---	0	---	0	---	0	0.3	3	---	0
Senecio litorosus	---	0	26.9	8	---	0	---	0	---	0	---	0	---	0
Rhynchosia caribaea	---	0	26.9	8	---	0	---	0	---	0	---	0	---	0
Lycium ferocissimum	---	0	26.9	8	---	0	---	0	---	0	---	0	---	0
Convolvulus bidentatus	---	0	26.9	8	---	0	---	0	---	0	---	0	---	0
Oncosiphon suffruticosus	---	0	26.9	8	---	0	---	0	---	0	---	0	---	0
Gladiolus gueinzii	---	0	26.9	8	---	0	---	0	---	0	---	0	---	0
Viscum rotundifolium	---	0	26.9	8	---	0	---	0	---	0	---	0	---	0
Scadoxus puniceus	---	0	26.9	8	---	0	---	0	---	0	---	0	---	0
Sporobolus virginicus	---	0	26.9	8	---	0	---	0	---	0	---	0	---	0
Senecio ilicifolius	---	0	26.9	8	---	0	---	0	---	0	---	0	---	0
Eustachys paspaloides	---	0	26.9	8	---	0	---	0	---	0	---	0	---	0
Cysticapnos cracca	---	0	26.9	8	---	0	---	0	---	0	---	0	---	0
Clematis brachiata	0.8	2	23.8	8	---	0	---	0	---	0	---	0	---	0
Erica irregularis	---	0	---	0	77.9	64	---	0	---	0	---	0	---	0
Indigofera brachystachya	---	0	---	0	75.8	64	---	0	---	0	---	3	---	0
Pentameris colorata	---	0	---	0	67.9	50	---	0	---	0	---	0	---	0
Olea capensis	---	0	---	0	64.6	50	---	0	---	4	---	0	---	0
Thamnochortus erectus	---	0	---	0	62.6	43	---	0	---	0	---	0	---	0
Clutia polygonoides	---	0	---	0	62.6	43	---	0	---	0	---	0	---	0
Ficinia indica	---	0	---	0	61.5	50	---	0	---	0	---	0	---	8
Anthospermum spathulatum	---	0	---	0	60	43	---	0	---	0	---	3	---	0
Hermannia ternifolia	---	0	---	0	56.8	36	---	0	---	0	---	0	---	0
Phylica dodii	---	0	---	0	56.8	36	---	0	---	0	---	0	---	0
Muraltia salsolacea	---	0	---	0	56.8	36	---	0	---	0	---	0	---	0
Ficinia gracilis	---	0	---	0	50.5	29	---	0	---	0	---	0	---	0
Ficinia tristachya	---	0	---	0	50.5	29	---	0	---	0	---	0	---	0
Pelargonium myrrhifolium	---	0	---	0	47.4	29	---	0	---	0	---	3	---	0
Metalasia densa	---	0	---	0	43.5	21	---	0	---	0	---	0	---	0
Leucadendron coniferum	---	0	---	0	43.5	21	---	0	---	0	---	0	---	0
Struthiola salteri	---	0	---	0	43.5	21	---	0	---	0	---	0	---	0
Hermannia joubertiana	---	0	---	0	43.5	21	---	0	---	0	---	0	---	0
Metalasia brevifolia	---	0	---	0	35.4	14	---	0	---	0	---	0	---	0
Helichrysum crispum	---	0	---	0	35.4	14	---	0	---	0	---	0	---	0
Erica plukenetii	---	0	---	0	35.4	14	---	0	---	0	---	0	---	0
Agathosma imbricata	---	0	---	0	35.4	14	---	0	---	0	---	0	---	0
Crassula fascicularis	---	0	---	0	35.4	14	---	0	---	0	---	0	---	0
Heliophila africana	---	0	---	0	35.4	14	---	0	---	0	---	0	---	0
Gazania pectinata	---	0	---	0	35.4	14	---	0	---	0	---	0	---	0
Cliffortia ilicifolia	---	0	---	0	35.4	14	---	0	---	0	---	0	---	0
Gnidia juniperifolia	---	0	---	0	35.4	14	---	0	---	0	---	0	---	0
Oxalis pardalis	---	0	---	0	35.4	14	---	0	---	0	---	0	---	0
Watsonia stenosiphon	---	0	---	0	35.4	14	---	0	---	0	---	0	---	0
Diosma subulata	---	0	---	0	35.4	14	---	0	---	0	---	0	---	0
Babiana nana	---	0	---	0	35.4	14	---	0	---	0	---	0	---	0
Selago aspera	---	0	---	0	35.4	14	---	0	---	0	---	0	---	0
Oedera capensis	---	0	---	0	35.4	14	---	0	---	0	---	0	---	0
Aspalathus salteri	---	0	---	0	35.4	14	---	0	---	0	---	0	---	0
Willdenowia teres	---	0	---	0	35.4	14	---	0	---	0	---	0	---	0
Crassula glomerata	---	0	---	0	35.4	14	---	0	---	0	---	0	---	0
Aspalathus ciliaris	---	0	---	0	35.4	14	---	0	---	0	---	0	---	0
Leucospermum patersonii	---	0	---	0	35.4	14	---	0	---	0	---	0	---	0
Erica magnisylvae	---	0	---	0	24.9	7	---	0	---	0	---	0	---	0
Kiggelaria africana	---	0	---	0	24.9	7	---	0	---	0	---	0	---	0
Chascanum cernuum	---	0	---	0	24.9	7	---	0	---	0	---	0	---	0
Helichrysum niveum	---	0	---	0	24.9	7	---	0	---	0	---	0	---	0
Leucadendron salignum	---	0	---	0	24.9	7	---	0	---	0	---	0	---	0
Dipogon lignosus	---	0	---	0	24.9	7	---	0	---	0	---	0	---	0
Ruschia sarmentosa	---	0	---	0	24.9	7	---	0	---	0	---	0	---	0
Lessertia capensis	---	0	---	0	24.9	7	---	0	---	0	---	0	---	0
Thesium capitatum	---	0	---	0	24.9	7	---	0	---	0	---	0	---	0
Pelargonium triste	---	0	---	0	24.9	7	---	0	---	0	---	0	---	0
Lycium afrum	---	0	---	0	24.9	7	---	0	---	0	---	0	---	0
Festuca scabra	---	0	---	0	24.9	7	---	0	---	0	---	0	---	0
Clutia alaternoides	---	0	---	0	24.9	7	---	0	---	0	---	0	---	0
Restio triticeus	---	0	---	0	24.9	7	---	0	---	0	---	0	---	0
Erica corifolia	---	0	---	0	24.9	7	---	0	---	0	---	0	---	0
Pelargonium cucullatum	---	0	---	0	24.9	7	---	0	---	0	---	0	---	0
Athanasia trifurcata	---	0	---	0	24.9	7	---	0	---	0	---	0	---	0
Pelargonium capitatum	---	0	---	0	24.9	7	---	0	---	0	---	0	---	0
Babiana montana	---	0	---	0	24.9	7	---	0	---	0	---	0	---	0
Polygala meridionalis	---	0	---	0	24.9	7	---	0	---	0	---	0	---	0
Protea repens	---	0	---	0	24.9	7	---	0	---	0	---	0	---	0
Lampranthus amabilis	---	0	---	0	24.9	7	---	0	---	0	---	0	---	0
Microdon dubius	---	0	---	0	24.9	7	---	0	---	0	---	0	---	0
Pseudoselago verbenacea	---	0	---	0	24.9	7	---	0	---	0	---	0	---	0
Elegia tectorum	---	0	---	0	24.9	7	---	0	---	0	---	0	---	0
Agathosma ciliaris	---	0	---	0	24.9	7	---	0	---	0	---	0	---	0
Hypodiscus willdenowia	---	0	---	0	24.9	7	---	0	---	0	---	0	---	0
Phylica disticha	---	0	---	0	24.9	7	---	0	---	0	---	0	---	0
Ficinia trichodes	---	0	---	0	24.9	7	---	0	---	0	---	0	---	0
Galium tomentosum	---	0	---	0	24.9	7	---	0	---	0	---	0	---	0
Erica sessiliflora	---	0	---	0	24.9	7	---	0	---	0	---	0	---	0
Anemone anemonoides	---	0	---	0	24.9	7	---	0	---	0	---	0	---	0
Phylica amoena	---	0	---	0	24.9	7	---	0	---	0	---	0	---	0
Thesium crassifolium	---	0	---	0	24.9	7	---	0	---	0	---	0	---	0
Thesium scabrum	---	0	---	0	24.9	7	---	0	---	0	---	0	---	0
Pelargonium sabulosum	---	0	---	0	24.9	7	---	0	---	0	---	0	---	0
Gladiolus miniatus	---	0	---	0	24.9	7	---	0	---	0	---	0	---	0
Colchicum eucomoides	---	0	---	0	24.9	7	---	0	---	0	---	0	---	0
Manulea cheiranthus	---	0	---	0	24.9	7	---	0	---	0	---	0	---	0
Albuca fragrans	---	0	---	0	24.9	7	---	0	---	0	---	0	---	0
Sebaea exacoides	---	0	---	0	24.9	7	---	0	---	0	---	0	---	0
Moraea bulbillifera	---	0	---	0	24.9	7	---	0	---	0	---	0	---	0
Cliffortia falcata	---	0	---	0	---	0	73.4	58	---	0	---	0	---	0
Chironia decumbens	---	0	---	0	---	0	66.8	48	---	0	---	0	---	0
Carpobrotus edulis	---	2	---	0	---	0	64.6	51	---	0	---	3	---	0
Tetraria picta	---	0	---	0	---	0	64.5	45	---	0	---	0	---	0
Disparago kraussii	---	0	---	0	---	0	64.5	45	---	0	---	0	---	0
Kyllinga pauciflora	---	0	---	0	---	0	63.7	44	---	0	---	0	---	0
Cliffortia linearifolia	---	0	---	0	---	0	62.9	43	---	0	---	0	---	0
Wahlenbergia thunbergii	---	0	---	0	---	0	58	37	---	0	---	0	---	0
Erica glandulosa	---	0	---	0	---	0	58	37	---	0	---	0	---	0
Lachnaea diosmoides	---	0	---	0	---	0	50.8	29	---	0	---	0	---	0
Indigofera frondosa	---	0	---	0	---	0	38.1	16	---	0	---	0	---	0
Heliophila cornuta	---	0	---	0	---	0	35.5	14	---	0	---	0	---	0
Senecio thunbergii	---	0	---	0	---	0	34.2	13	---	0	---	0	---	0
Cyperus obtusiflorus	---	0	---	0	---	0	32.9	12	---	0	---	0	---	0
Lotononis umbellata	---	0	---	0	---	0	32.9	12	---	0	---	0	---	0
Thesium densiflorum	---	0	---	0	---	0	31.4	11	---	0	---	0	---	0
Pharnaceum dichotomum	---	0	---	0	---	0	29.9	10	---	0	---	0	---	0
Freesia corymbosa	---	0	---	0	---	0	26.7	8	---	0	---	0	---	0
Dimorphotheca nudicaulis	---	0	---	0	---	0	26.7	8	---	0	---	0	---	0
Struthiola tomentosa	---	0	---	0	---	0	26.7	8	---	0	---	0	---	0
Acacia cyclops	---	0	---	0	---	0	16.3	3	---	0	---	0	---	0
Helichrysum felinum	---	0	---	0	---	0	13.3	2	---	0	---	0	---	0
Crossyne guttata	---	0	---	0	---	0	13.3	2	---	0	---	0	---	0
Restio leptoclados	---	0	---	8	---	7	---	0	63.5	63	---	6	---	0
Agathosma stenopetala	---	0	---	0	---	0	---	0	61.6	42	---	0	---	0
Vellereophyton vellereum	---	0	---	0	---	0	---	0	54.8	33	---	0	---	0
Phylica litoralis	---	0	---	0	---	0	---	0	51.1	29	---	0	---	0
Indigofera stricta	---	0	---	0	---	0	---	0	47.1	25	---	0	---	0
Tephrosia capensis	---	0	---	0	---	0	---	0	42.9	21	---	0	---	0
Satyrium princeps	---	0	---	0	---	0	---	0	42.9	21	---	0	---	0
Hebenstretia integrifolia	---	0	---	0	---	0	---	2	40.3	21	---	0	---	0
Oxalis polyphylla	---	0	---	0	---	0	---	0	38.3	17	---	0	---	0
Aspalathus spicata	---	0	---	0	---	0	---	0	38.3	17	---	0	---	0
Tribolium obtusifolium	---	0	---	0	---	0	---	0	38.3	17	---	0	---	0
Ficinia albicans	---	0	---	0	---	0	---	0	38.3	17	---	0	---	0
Othonna rufibarbis	---	0	---	0	---	0	---	0	38.3	17	---	0	---	0
Thesium leptocaule	---	0	---	0	---	0	---	0	33	13	---	0	---	0
Anchusa capensis	---	0	---	0	---	0	---	0	33	13	---	0	---	0
Sporobolus africanus	---	0	---	0	---	0	---	0	33	13	---	0	---	0
Setaria sphacelata	---	0	---	0	---	0	---	0	33	13	---	0	---	0
Erica chloroloma	---	0	---	0	---	0	---	0	33	13	---	0	---	0
Anemone knowltonia	---	0	---	0	---	0	---	0	33	13	---	0	---	0
Themeda triandra	---	2	---	0	---	0	---	0	30.4	13	---	0	---	0
Pelargonium capillare	---	0	---	0	---	0	---	0	26.9	8	---	0	---	0
Stenotaphrum secundatum	---	0	---	0	---	0	---	0	26.9	8	---	0	---	0
Centella coriacea	---	0	---	0	---	0	---	0	26.9	8	---	0	---	0
Silene bellidioides	---	0	---	0	---	0	---	0	26.9	8	---	0	---	0
Hypoxis zeyheri	---	0	---	0	---	0	---	0	26.9	8	---	0	---	0
Osteospermum imbricatum	---	0	---	0	---	0	---	0	26.9	8	---	0	---	0
Cullumia decurrens	---	0	---	0	---	0	---	0	26.9	8	---	0	---	0
Boophone disticha	---	0	---	0	---	0	---	0	26.9	8	---	0	---	0
Struthiola argentea	---	0	---	0	---	0	---	0	19	4	---	0	---	0
Aspalathus setacea	---	0	---	0	---	0	---	0	19	4	---	0	---	0
Hermannia althaeifolia	---	0	---	0	---	0	---	0	19	4	---	0	---	0
Silene primuliflora	---	0	---	0	---	0	---	0	19	4	---	0	---	0
Dasispermum suffruticosum	---	0	---	0	---	0	---	0	19	4	---	0	---	0
Searsia incisa	---	0	---	0	---	0	---	0	19	4	---	0	---	0
Fuirena hirsuta	---	0	---	0	---	0	---	0	19	4	---	0	---	0
Isolepis venustula	---	0	---	0	---	0	---	0	19	4	---	0	---	0
Satyrium coriifolium	---	0	---	0	---	0	---	0	19	4	---	0	---	0
Aizoon rigidum	---	0	---	0	---	0	---	0	19	4	---	0	---	0
Adenocline pauciflora	---	0	---	0	---	0	---	0	19	4	---	0	---	0
Muraltia scoparia	---	0	---	0	---	0	---	0	19	4	---	0	---	0
Jamesbrittenia fruticosa	---	0	---	0	---	0	---	0	19	4	---	0	---	0
Pelargonium longifolium	---	0	---	0	---	0	---	0	19	4	---	0	---	0
Selago corymbosa	---	0	---	0	---	0	---	0	19	4	---	0	---	0
Manulea obovata	---	0	---	0	---	0	---	0	19	4	---	0	---	0
Cyrtanthus loddigesianus	---	0	---	0	---	0	---	0	19	4	---	0	---	0
Indigofera sulcata	---	0	---	0	---	0	---	0	19	4	---	0	---	0
Indigofera procumbens	---	0	---	0	---	0	---	0	19	4	---	0	---	0
Kyllinga alba	---	0	---	0	---	0	---	0	19	4	---	0	---	0
Delosperma litorale	---	0	---	0	---	0	---	0	19	4	---	0	---	0
Chaenostoma polyanthum	---	0	---	0	---	0	---	0	19	4	---	0	---	0
Cotula sericea	---	0	---	0	---	0	---	0	19	4	---	0	---	0
Cliffortia filifolia	---	0	---	0	---	0	---	0	19	4	---	0	---	0
Thamnochortus glaber	---	0	---	0	---	0	---	0	19	4	---	0	---	0
Eriospermum brevipes	---	0	---	0	---	0	---	0	19	4	---	0	---	0
Ficinia filiformis	---	0	---	0	---	0	---	0	19	4	---	0	---	0
Hermannia flammea	---	0	---	0	---	0	---	0	19	4	---	0	---	0
Crassula umbellata	---	0	---	0	---	0	---	0	---	0	56.4	35	---	0
Disparago anomala	---	0	---	0	0.4	7	---	0	---	0	55.2	41	---	0
Helichrysum retortum	---	0	---	0	---	0	---	0	---	0	51.3	29	---	0
Schoenus arenicola	---	0	---	0	---	0	---	0	---	0	45.7	24	---	0
Lampranthus fergusoniae	---	0	---	0	---	0	---	0	---	0	45.7	24	---	0
Agathosma dielsiana	---	0	---	0	---	0	---	0	---	0	39.4	18	---	0
Indigofera calciphila	---	0	---	0	---	0	---	0	---	0	39.4	18	---	0
Erica bredasiana	---	0	---	0	---	0	---	0	---	0	35.9	15	---	0
Argyrolobium harmsianum	---	0	---	0	---	0	---	0	---	0	35.9	15	---	0
Trachyandra ciliata	---	0	---	0	---	0	---	0	---	0	35.9	15	---	0
Agathosma geniculata	---	0	---	0	---	0	---	0	---	0	35.9	15	---	0
Silene aethiopica	---	0	---	0	---	0	---	0	---	0	32	12	---	0
Crassula filiformis	---	0	---	0	---	0	---	0	---	0	32	12	---	0
Acmadenia obtusata	---	0	---	0	---	0	---	0	---	0	27.7	9	---	0
Manulea caledonica	---	0	---	0	---	0	---	0	---	0	27.7	9	---	0
Erica vernicosa	---	0	---	0	---	0	---	0	---	0	27.7	9	---	0
Indigofera harveyi	---	0	---	0	---	0	---	0	---	0	27.7	9	---	0
Limeum telephioides	---	0	---	0	---	0	---	0	---	0	27.7	9	---	0
Chaenostoma placidum	---	0	---	0	---	0	---	0	---	0	27.7	9	---	0
Oxalis stellata	---	0	---	0	---	0	---	0	---	0	22.5	6	---	0
Pelargonium ovale	---	0	---	0	---	0	---	0	---	0	22.5	6	---	0
Berkheya coriacea	---	0	---	0	---	0	---	0	---	0	22.5	6	---	0
Dianthus albens	---	0	---	0	---	0	---	0	---	0	22.5	6	---	0
Crassula ericoides	---	0	---	0	---	0	---	0	---	0	22.5	6	---	0
Moraea tripetala	---	0	---	0	---	0	---	0	---	0	22.5	6	---	0
Adromischus caryophyllaceus	---	0	---	0	---	0	---	0	---	0	22.5	6	---	0
Senecio arenarius	---	0	---	0	---	0	---	0	---	0	22.5	6	---	0
Thesium commutatum	---	0	---	0	---	0	---	0	---	0	22.5	6	---	0
Ficinia nodosa	---	0	---	0	---	0	---	0	---	0	15.9	3	---	0
Oedera genistifolia	---	0	---	0	---	0	---	0	---	0	15.9	3	---	0
Psoralea repens	---	0	---	0	---	0	---	0	---	0	15.9	3	---	0
Eriocephalus racemosus	---	0	---	0	---	0	---	0	---	0	15.9	3	---	0
Phylica selaginoides	---	0	---	0	---	0	---	0	---	0	15.9	3	---	0
Annesorhiza macrocarpa	---	0	---	0	---	0	---	0	---	0	15.9	3	---	0
Pelargonium lobatum	---	0	---	0	---	0	---	0	---	0	15.9	3	---	0
Crassula dichotoma	---	0	---	0	---	0	---	0	---	0	15.9	3	---	0
Ifloga repens	---	0	---	0	---	0	---	0	---	0	15.9	3	---	0
Ursinia trifida	---	0	---	0	---	0	---	0	---	0	15.9	3	---	0
Pharnaceum cordifolium	---	0	---	0	---	0	---	0	---	0	15.9	3	---	0
Chrysocoma strigosa	---	0	---	0	---	0	---	0	---	0	15.9	3	---	0
Diosma guthriei	---	0	---	0	---	0	---	0	---	0	15.9	3	---	0
Crassothonna capensis	---	0	---	0	---	0	---	0	---	0	15.9	3	---	0
Metalasia pungens	---	0	---	0	---	0	---	0	---	0	15.9	3	---	0
Wahlenbergia calcarea	---	0	---	0	---	0	---	0	---	0	15.9	3	---	0
Hemimeris sabulosa	---	0	---	0	---	0	---	0	---	0	15.9	3	---	0
Lessertia frutescens	---	0	---	0	---	0	---	0	---	0	15.9	3	---	0
Chironia tetragona	---	0	---	0	---	0	---	0	---	0	15.9	3	---	0
Asparagus lignosus	---	0	---	0	---	0	---	0	---	0	15.9	3	---	0
Oncosiphon suffruticosum	---	0	---	0	---	0	---	0	---	0	15.9	3	---	0
Drosanthemum candens	---	0	---	0	---	0	---	0	---	0	15.9	3	---	0
Oxalis obtusa	---	0	---	0	---	0	---	0	---	0	15.9	3	---	0
Lessertia miniata	---	0	---	0	---	0	---	0	---	0	15.9	3	---	0
Bulbine frutescens	---	0	---	0	---	0	---	0	---	0	15.9	3	---	0
Dasispermum hispidum	---	0	---	0	---	0	---	0	---	0	15.9	3	---	0
Ruschia macowanii	---	0	---	0	---	0	---	0	---	0	15.9	3	---	0
Silene undulata	---	0	---	0	---	0	---	0	---	0	15.9	3	---	0
Rumex cordatus	---	0	---	0	---	0	---	0	---	0	15.9	3	---	0
Crassula muscosa	---	0	---	0	---	0	---	0	---	0	---	0	47.1	25
Selago thomii	---	0	---	0	---	0	---	0	---	0	---	0	38.3	17
Felicia tenella	---	0	---	0	---	0	---	0	---	0	---	0	38.3	17
Mesembryanthemum aitonis	---	2	---	0	---	0	---	0	---	0	---	0	35.9	17
Achyranthemum argenteum	---	0	---	0	---	0	---	0	---	0	---	0	26.9	8
Schoenus australis	---	0	---	0	---	0	---	0	---	0	---	0	26.9	8
Cynanchum ellipticum	---	0	---	0	---	0	---	0	---	0	---	0	26.9	8
Indigofera verrucosa	---	0	---	0	---	0	---	0	---	0	---	0	26.9	8
Tenaxia stricta	---	0	---	0	---	0	---	0	---	0	---	0	26.9	8
Solanum linnaeanum	---	0	---	0	---	0	---	0	---	0	---	0	26.9	8
Indigofera glaucescens	---	0	---	0	---	0	---	0	---	0	---	0	26.9	8
Panicum maximum	0.8	2	---	0	---	0	---	0	---	0	---	0	23.8	8
Mystroxylon aethiopicum	56.8	83	17	42	---	0	---	13	---	21	---	0	---	8
Sideroxylon inerme	53.9	97	49.6	92	---	0	---	0	---	25	---	9	---	17
Clausena anisata	50.7	43	11.8	17	---	0	---	0	---	0	---	0	---	0
Carissa bispinosa	43.2	72	38.5	67	---	0	---	0	---	21	---	3	---	17
Rhoicissus digitata	39.8	62	36.5	58	---	0	---	0	---	8	---	6	---	17
Asparagus aethiopicus	34.5	73	50.4	92	---	7	---	2	---	0	---	26	---	33
Panicum deustum	31.9	42	51.4	58	---	0	---	0	---	0	---	0	---	0
Azima tetracantha	24.6	25	36.9	33	---	0	---	0	---	0	---	0	---	0
Chionanthus foveolatus	23.2	22	15.2	17	0.1	7	---	0	---	4	---	0	---	0
Dovyalis rotundifolia	21.6	12	---	0	---	0	---	0	---	0	---	0	13.4	8
Ehrharta erecta	18.6	7	---	0	---	0	---	0	---	0	5.5	3	---	0
Pteridium aquilinum	17	7	---	0	---	0	8.6	4	---	0	---	0	---	0
Lepidium africanum	16.9	7	---	0	---	0	---	0	8.7	4	---	0	---	0
Scolopia zeyheri	15.8	12	26.1	17	---	0	---	0	---	0	---	0	---	0
Asparagus africanus	12.8	7	---	0	---	0	---	0	17.5	8	---	0	---	0
Euphorbia erythrina	11.5	12	---	0	---	0	37.1	26	---	0	---	0	---	0
Aloe africana	9.2	5	---	0	---	0	---	0	---	0	---	0	19.2	8
Solanum americanum	9.2	5	---	0	---	0	---	0	19.2	8	---	0	---	0
Pilogyne scabra	9	3	---	0	---	0	---	0	12.3	4	---	0	---	0
Anemone vesicatoria	7.4	28	45.9	67	---	14	---	18	---	0	---	3	---	17
Kedrostis nana	7	15	54.9	50	---	0	---	0	---	4	---	0	---	0
Commelina benghalensis	3.7	2	---	0	---	0	---	0	15	4	---	0	---	0
Rhamnus prinoides	3.7	2	---	0	---	0	---	0	15	4	---	0	---	0
Asparagus rubicundus	1.5	2	---	0	21.5	7	---	0	---	0	---	0	---	0
Drosanthemum intermedium	1.5	2	---	0	21.5	7	---	0	---	0	---	0	---	0
Roepera morgsana	---	2	67.6	67	---	0	---	0	---	0	6.7	18	---	0
Euphorbia burmannii	---	0	59.5	58	---	0	---	0	---	0	3.9	15	---	8
Cissampelos capensis	---	0	50.7	42	9.5	14	---	0	---	0	---	0	---	0
Solanum africanum	---	2	46.6	42	---	0	---	0	---	0	---	3	11	17
Searsia pterota	---	0	45.7	42	---	0	---	0	---	0	7.7	15	---	8
Asparagus volubilis	---	0	39.8	25	5	7	---	0	---	0	---	0	---	0
Astephanus triflorus	---	0	35.4	25	---	0	---	1	---	0	11.5	12	---	0
Tetragonia fruticosa	---	0	33.5	33	---	0	---	0	---	0	32.2	32	---	0
Cynanchum viminale	---	3	32.3	25	---	0	---	0	---	0	---	6	3.9	8
Crassula pubescens	---	0	25.2	25	---	0	---	0	---	0	23	24	0.3	8
Wachendorfia paniculata	---	0	21.8	8	---	0	---	0	---	0	4.3	3	---	0
Zaluzianskya gracilis	---	0	21.8	8	---	0	---	0	---	0	4.3	3	---	0
Oxalis incarnata	---	0	20.2	8	---	0	---	0	7.3	4	---	0	---	0
Jamesbrittenia stellata	---	0	18.2	8	---	0	---	0	---	0	11.1	6	---	0
Senecio elegans	---	0	18.2	8	---	0	---	0	---	0	11.1	6	---	0
Adenocline violifolia	---	0	18.2	8	---	0	---	0	---	0	11.1	6	---	0
Thesium frisea	---	0	18.2	8	---	0	---	0	---	0	11.1	6	---	0
Otholobium algoensis	---	0	15.9	8	---	0	---	0	---	0	---	0	15.9	8
Gasteria carinata	---	0	15.9	8	---	0	---	0	---	0	---	0	15.9	8
Helichrysum versicolor	---	0	15.9	8	---	0	---	0	---	0	---	0	15.9	8
Brunsvigia orientalis	---	0	15.5	8	---	0	---	0	---	0	16.8	9	---	0
Thesium confusum	---	0	13.4	8	---	0	---	0	---	0	21.7	12	---	0
Ledebouria ovalifolia	---	0	11.5	8	---	0	---	0	---	0	26.1	15	---	0
Lachenalia punctata	---	0	11.5	8	---	0	---	0	---	0	26.1	15	---	0
Erica coccinea	---	0	11.5	8	---	0	---	0	---	0	26.1	15	---	0
Cerastium capense	---	0	10.6	8	---	0	28.6	16	---	0	---	0	---	0
Indigofera porrecta	---	0	10.5	8	---	0	---	0	---	0	---	0	28.8	17
Pharnaceum thunbergii	---	0	10.5	8	---	0	---	0	---	0	---	0	28.8	17
Hellmuthia membranacea	---	0	10	8	---	0	---	0	---	0	30.1	18	---	0
Oxalis depressa	---	0	10	8	---	0	---	0	---	0	30.1	18	---	0
Othonna undulosa	---	0	8.6	8	---	0	---	0	---	0	33.8	21	---	0
Felicia amoena	---	0	8.6	17	---	7	---	0	---	4	45.4	44	---	0
Geranium incanum	---	2	7.9	8	---	0	24.2	16	---	4	---	0	---	0
Jordaaniella maritima	---	0	6.3	8	---	0	---	0	---	0	40.4	26	---	0
Restio calcicola	---	0	5.3	8	---	0	---	0	---	0	43.4	29	---	0
Indigofera candicans	---	0	4.8	8	---	0	---	0	---	0	0.5	6	34.4	25
Passerina paleacea	---	0	4.6	17	---	0	---	0	---	0	73.9	74	---	0
Agathosma collina	---	0	4.4	8	---	0	---	0	---	0	46.3	32	---	0
Senecio arniciflorus	---	0	3.5	8	---	0	---	0	---	0	49.1	35	---	0
Pelargonium betulinum	---	0	---	0	79.4	86	1.2	16	---	0	---	6	---	0
Massonia pustulata	---	0	---	0	49.5	36	---	0	3.4	8	---	0	---	0
Jamesbrittenia albomarginata	---	0	---	0	43.2	36	---	0	---	0	15.4	18	---	0
Scabiosa columbaria	---	0	---	0	38.1	29	7.1	10	---	4	---	0	---	0
Nemesia affinis	---	0	---	0	37	21	---	0	---	0	4.2	6	---	0
Aspalathus globulosa	---	0	---	0	31.2	14	---	0	---	0	1.3	3	---	0
Satyrium carneum	---	0	---	0	30	21	---	0	---	0	17.6	15	---	0
Phylica ericoides	---	0	---	17	25.6	43	---	0	---	0	45.5	62	---	8
Selago canescens	---	0	---	0	25.5	14	---	0	---	0	---	0	11.8	8
Chrysocoma coma	---	0	---	0	19.5	7	---	0	---	0	5.1	3	---	0
Aspalathus forbesii	---	0	---	0	19.5	7	---	0	---	0	5.1	3	---	0
Searsia lucida	---	5	---	17	18.5	36	---	0	33.6	50	---	12	---	8
Seriphium plumosum	---	0	---	0	17.9	7	---	0	8.3	4	---	0	---	0
Koeleria capensis	---	0	---	0	17.5	14	---	0	---	0	29.3	21	---	0
Linum africanum	---	0	---	0	17.3	14	---	0	29.6	21	---	0	---	0
Isolepis marginata	---	0	---	0	13.3	7	---	0	---	0	17.9	9	---	0
Wahlenbergia tenella	---	0	---	0	11.2	7	---	0	---	0	22.8	12	---	0
Albuca juncifolia	---	0	---	0	11.2	7	---	0	---	0	22.8	12	---	0
Morella quercifolia	---	0	---	0	5.3	14	---	9	36.4	38	---	3	---	8
Pelargonium suburbanum	---	0	---	0	1.3	7	---	0	52	38	---	0	---	0
Imperata cylindrica	---	0	---	0	---	0	48.4	62	26.5	42	---	0	---	17
Clutia rubricaulis	---	0	---	0	---	0	47.9	34	3.9	8	---	0	---	0
Agathosma muirii	---	0	---	0	---	0	44.9	29	---	0	1.7	6	---	0
Helichrysum cymosum	---	0	---	0	---	0	31.5	30	18.2	21	---	0	---	8
Chaenostoma hispidum	---	0	---	0	---	0	29.5	15	---	0	6.7	6	---	0
Centella tridentata	---	0	---	0	---	0	28	19	16	13	---	0	---	0
Muraltia squarrosa	---	0	---	0	---	0	25.1	34	54.5	58	---	0	---	0
Asparagus suaveolens	---	2	---	0	---	0	24.3	14	10.8	8	---	0	---	0
Cymbopogon marginatus	---	0	---	0	0.3	14	23.5	34	42.2	50	---	0	---	0
Ficinia ramosissima	---	15	---	17	---	7	22.9	55	0	29	32	65	---	17
Linum thunbergii	---	0	---	0	---	0	14.6	12	30.9	21	---	0	---	0
Tarchonanthus camphoratus	---	2	---	0	---	0	14.5	8	14.7	8	---	0	---	0
Polygala ericaefolia	---	0	---	0	---	0	13.7	10	27.2	17	---	0	---	0
Lessertia stenoloba	---	0	---	0	---	0	6.5	2	---	0	10.8	3	---	0
Ficinia bulbosa	---	0	---	8	1	14	4.8	18	---	13	---	0	33.7	42
Thesium strictum	---	0	---	0	---	0	4.8	5	31.8	17	---	0	---	0
Felicia echinata	---	2	---	8	---	7	---	0	64	71	---	0	2	17
Senecio burchellii	---	0	---	0	---	0	---	0	40.9	25	2.9	6	---	0
Cynodon dactylon	---	2	---	0	---	0	---	0	35.3	25	---	3	5.3	8
Jamesbrittenia microphylla	---	0	0.7	17	---	0	---	0	33.1	46	---	0	37.7	50
Rapanea gilliana	---	0	---	0	---	0	---	0	30.9	38	---	0	46.3	50
Elegia microcarpa	---	0	---	0	---	0	---	0	26.7	29	---	6	32.4	33
Zaluzianskya maritima	---	0	---	0	---	0	---	0	22.9	13	---	0	12.9	8
Heliophila subulata	---	0	---	0	---	0	---	0	15.5	8	16.8	9	---	0
Agathosma apiculata	---	5	---	17	---	0	---	0	12.9	29	---	3	53.5	67
Pelargonium grossularioides	---	0	---	0	---	0	---	0	10.5	8	---	0	28.8	17
Crassula nudicaulis	---	0	---	8	---	0	---	0	9.8	17	---	9	32.9	33
Chrysocoma ciliata	---	0	---	0	---	0	---	0	2.9	4	---	0	32.9	17
Helichrysum litorale	---	0	---	0	---	0	---	0	---	0	26.1	15	11.5	8
Thamnochortus insignis	---	0	---	0	---	0	---	0	---	4	13.8	12	23.3	17
Gladiolus floribundus	---	0	---	0	---	0	---	0	---	0	4.3	3	21.8	8
Coleonema pulchellum	---	0	---	0	---	0	---	0	---	0	4.3	3	21.8	8
Muraltia spinosa	---	0	---	8	---	0	---	0	---	0	4.2	12	47.3	42
Polygala myrtifolia	46.6	48	6.4	17	---	0	---	0	---	0	---	0	6.4	17
Cussonia thyrsiflora	44.7	63	22.5	42	---	0	---	0	5.4	25	---	0	---	8
Scutia myrtina	22.6	18	4.9	8	---	0	---	0	---	4	---	0	4.9	8
Chasmanthe aethiopica	20.6	15	7.5	8	---	0	---	0	7.5	8	---	0	---	0
Pterocelastrus tricuspidatus	18.8	65	40.8	92	---	14	---	15	---	29	3.9	47	---	33
Rhoiacarpos capensis	18.4	12	---	0	---	0	---	0	1.6	4	---	0	10.9	8
Viscum capense	13.5	12	---	0	---	0	14.8	12	---	0	8	9	---	0
Bonatea speciosa	6.8	8	22.8	17	---	0	---	0	---	0	---	0	6.8	8
Clutia daphnoides	6.5	5	---	0	---	0	---	0	4.4	4	---	0	15.3	8
Euclea racemosa	6.5	83	14.5	92	---	71	---	61	---	75	---	71	6.5	83
Asparagus asparagoides	4.2	7	23.9	17	---	0	---	0	---	0	---	0	7.5	8
Cynanchum obtusifolium	3.6	22	51.2	67	---	0	---	0	16	33	---	6	---	0
Rhoicissus tridentata	2.9	8	---	0	---	0	---	0	37.3	29	---	0	2.9	8
Viscum obscurum	2.9	3	---	0	---	0	---	0	5.2	4	---	0	16.7	8
Asplenium adiantum	2.5	3	---	0	---	0	7.3	5	15.8	8	---	0	---	0
Schotia afra	1.4	5	---	0	---	0	---	0	25	17	---	0	8.2	8
Colpoon compressum	---	2	49.3	58	---	0	---	0	1.8	17	6.3	21	---	8
Lauridia tetragona	---	20	37.8	67	---	0	---	0	14.5	42	---	21	6.8	33
Searsia glauca	---	13	35.4	92	---	7	---	46	18.3	71	15.7	68	---	42
Asparagus capensis	---	0	27.2	42	---	7	---	0	---	0	20.2	35	18.1	33
Myrsine africana	---	7	25.5	33	2.1	14	---	0	---	0	---	9	15.3	25
Crassula expansa	---	0	19.6	42	---	7	---	5	---	8	10.4	32	36	58
Helichrysum patulum	---	0	18.6	17	2.1	7	---	0	---	0	20.3	18	---	0
Rubia petiolaris	---	7	15.3	17	---	0	5.1	10	---	4	7.5	12	---	0
Maytenus procumbens	---	0	14.7	25	---	0	---	0	29.9	38	---	3	14.7	25
Cotyledon orbiculata	---	0	14.6	25	---	0	---	0	9.5	21	---	12	24.7	33
Osteospermum moniliferum	---	2	13.2	17	---	7	---	0	6.9	13	14.6	18	---	0
Searsia crenata	---	10	13	33	---	0	16.8	37	25.6	46	---	9	---	8
Ficinia dunensis	---	0	12.1	25	---	0	---	0	---	0	24	35	31.4	42
Euphorbia mauritanica	---	2	10.9	8	---	0	---	0	---	0	5.4	6	10.9	8
Roepera maritima	---	0	8.5	8	---	0	---	0	17	13	---	0	8.5	8
Pentameris curvifolia	---	0	8.1	17	---	0	---	0	---	0	28.9	32	19.2	25
Cynanchum africanum	0.9	12	7.4	17	---	7	3.2	13	---	0	---	3	18.3	25
Helichrysum teretifolium	---	10	6.7	42	---	0	---	29	39.1	79	8.8	44	---	33
Phylica axillaris	---	0	6.7	8	---	0	---	0	---	0	7.6	9	22.5	17
Carpobrotus deliciosus	---	2	5.7	17	---	0	---	0	36.9	42	---	0	16.1	25
Mesembryanthemum canaliculatum	---	0	5.6	8	---	0	---	0	---	0	11.9	12	20.9	17
Crassula campestris	---	0	3.8	8	---	0	---	0	---	0	19.7	18	18	17
Roepera flexuosa	---	0	3.5	17	---	7	---	0	---	0	39.6	47	13.4	25
Astephanus zeyheri	---	0	3.3	8	---	0	22.1	20	---	0	---	0	17.2	17
Agathosma cerefolium	---	0	2.8	8	24.3	21	---	0	---	0	---	0	16.5	17
Chaenostoma campanulatum	---	0	2.8	17	---	0	---	0	41.7	50	---	0	22.2	33
Salvia aurea	---	0	1.8	8	11.1	14	---	0	28	25	---	3	---	0
Helichrysum dasyanthum	---	0	1.1	8	21.3	21	---	0	---	0	24.5	24	---	0
Passerina corymbosa	---	3	---	0	40	79	19.2	55	36.9	75	---	0	---	17
Tetraria cuspidata	---	0	---	0	35	64	33.7	63	29.4	58	---	0	---	0
Anthospermum aethiopicum	---	3	---	0	32	71	23.8	62	35.1	75	---	3	---	25
Cassytha ciliolata	---	2	---	0	28.2	36	---	4	4.8	17	---	6	15	25
Searsia laevigata	---	5	---	8	24.4	50	---	0	24.4	50	---	24	8.6	33
Tribolium hispidum	---	0	---	0	23.9	21	2.4	8	---	0	17.7	18	---	0
Metalasia muricata	---	10	---	25	16.6	64	30.7	81	---	29	24.2	74	---	25
Melica racemosa	---	3	---	0	2.6	7	11.9	12	19.5	17	---	0	---	0
Otholobium bracteolatum	---	0	---	8	1.2	14	---	0	19.1	29	33.6	41	---	0
Ehrharta villosa	---	2	---	0	1.2	7	---	0	17	17	---	3	17	17
Disparago ericoides	---	0	---	0	1	7	4.6	9	37.5	29	---	0	---	0
Pentameris heptameris	---	0	---	0	---	0	46.3	61	21.3	38	---	0	7.9	25
Muraltia satureioides	---	0	---	8	---	14	43	62	---	0	9.8	29	5.3	25
Ficinia lateralis	---	0	---	8	---	0	15.4	34	14.7	33	32	50	---	8
Anthospermum prostratum	---	0	---	8	---	0	12.3	31	14.8	33	26.1	44	---	17
Erica glumiflora	---	0	---	0	---	0	12.2	15	20.5	21	---	0	14	17
Stipagrostis zeyheri	---	0	---	8	---	0	11.9	21	6.8	17	---	9	17.6	25
Morella cordifolia	---	0	---	0	---	0	10.3	12	17.6	17	14.3	15	---	0
Heliophila linearis	---	0	---	8	---	0	9.9	20	---	0	22.4	29	16.8	25
Limonium scabrum	---	0	---	0	---	14	6.5	24	25.8	42	18.9	35	---	8
Passerina rigida	---	0	---	0	---	0	2.3	5	---	0	22.2	15	8.9	8
Helichrysum asperum	---	0	---	0	---	0	---	0	24.4	17	2.9	6	7.8	8
Gazania krebsiana	---	0	---	8	---	0	---	0	21.2	25	11	18	9.7	17
Cassine peragua	30.3	53	2.6	25	---	21	---	8	2.6	25	1.1	24	---	0
Putterlickia pyracantha	5.3	20	10.9	25	---	0	---	0	15.6	29	---	0	20.4	33
Olea exasperata	---	35	30.3	92	---	21	10.1	67	6.4	63	---	47	3	58
Carpobrotus acinaciformis	---	0	11.1	33	6.4	29	---	0	---	0	44.9	68	2.9	25
Crassula subulata	---	0	10.4	25	6.4	21	---	0	---	0	35.1	47	1	17
Ehrharta calycina	---	0	2.6	17	---	7	19.2	31	---	0	17.5	29	2.6	17
Chironia baccifera	---	3	2.6	25	---	7	---	0	35.2	58	6.9	29	10.7	33
Restio eleocharis	---	0	---	67	---	64	23.2	97	14.7	88	18	91	18.5	92

## Sheet: Mesic DT
Mesic Dune Thicket
Releves	60
Species	140
Species	Freq %	Average cover % (Barkman's TCV)	Average non-zero cover %
Sideroxylon inerme	97	33.3	30.7
Euclea racemosa	83	10.5	9.9
Mystroxylon aethiopicum	83	15.9	16.2
Asparagus aethiopicus	73	1.3	1.1
Carissa bispinosa	72	3.9	3.9
Pterocelastrus tricuspidatus	65	15.8	18.6
Grewia occidentalis	63	1.7	1.5
Cussonia thyrsiflora	63	4.2	5.2
Rhoicissus digitata	62	4.8	6.7
Cassine peragua	53	5.9	10.1
Dovyalis rhamnoides	53	3	4
Polygala myrtifolia	48	0.6	0.6
Behnia reticulata	48	0.4	0.4
Secamone alpini	45	2.8	4.4
Clausena anisata	43	0.7	1.1
Panicum deustum	42	3.9	5.7
Olea exasperata	35	3.7	7.4
Gymnosporia buxifolia	33	2.5	5.3
Stachys aethiopica	30	0.5	0.8
Roepera sessilifolia	30	0.8	1.6
Anemone vesicatoria	28	0.2	0.2
Asparagus plumosus	27	0.9	2.3
Azima tetracantha	25	1.1	2.6
Cynanchum natalitium	23	0	0
Chionanthus foveolatus	22	6	25.6
Cynanchum obtusifolium	22	1	4.4
Searsia undulata	20	0.5	1.3
Allophylus decipiens	20	1.5	5.1
Diospyros whyteana	20	0.4	1.2
Lauridia tetragona	20	0.6	2.5
Putterlickia pyracantha	20	3.5	17.6
Acokanthera oppositifolia	18	0.1	0.1
Senecio quinquelobus	18	0.1	0
Scutia myrtina	18	9.3	50.7
Ficinia ramosissima	15	0.2	0.6
Chasmanthe aethiopica	15	0.1	0.4
Kedrostis nana	15	0	0
Hypoestes aristata	13	1.5	9.2
Searsia glauca	13	4.7	34.9
Brachiaria chusqueoides	13	2.7	19.9
Zanthoxylum capense	13	2	14.9
Viscum capense	12	0.1	0.2
Cynanchum africanum	12	0.1	0.2
Dioscorea mundii	12	0	0
Euphorbia erythrina	12	0	0
Apodytes dimidiata	12	0.3	1.2
Scolopia zeyheri	12	3.4	29.4
Rhoiacarpos capensis	12	3	25.9
Dovyalis rotundifolia	12	3.6	30.9
Metalasia muricata	10	0.8	5.9
Helichrysum teretifolium	10	0.1	0.3
Searsia crenata	10	0.5	3.6
Sutera griquensis	10	0.3	2.1
Amaranthus thunbergii	10	0	0
Bonatea speciosa	8	0	0
Rhoicissus tridentata	8	0.8	9
Rubia petiolaris	7	0.1	0.4
Pteridium aquilinum	7	0	0
Asparagus africanus	7	0	0
Lepidium africanum	7	0.2	3
Robsonodendron maritimum	7	1.6	24.3
Asparagus asparagoides	7	0.2	3
Searsia longispina	7	2	30.5
Droguetia iners	7	3.8	56.3
Myrsine africana	7	0.5	5
Ehrharta erecta	7	0.1	0.8
Solanum sodomaeodes	5	0	0
Agathosma apiculata	5	0.9	18
Olea europaea	5	1.2	24.7
Solanum americanum	5	0.2	3
Searsia lucida	5	0.2	3
Aloe africana	5	1.4	28
Searsia laevigata	5	0.7	14.3
Cotyledon velutina	5	0.2	3
Schotia afra	5	3.7	74.7
Clutia daphnoides	5	0.9	18
Leidesia procumbens	5	2.3	46.3
Canthium spinosum	5	1.7	34.7
Stipa dregeana	5	0.7	13.7
Zantedeschia aethiopica	5	0.1	1.3
Viscum obscurum	3	0.1	3
Anthospermum aethiopicum	3	0.1	3
Passerina corymbosa	3	0.1	3
Melica racemosa	3	0.4	11.5
Chironia baccifera	3	0.3	8
Canthium inerme	3	0.7	20.5
Diospyros dichrophylla	3	0.7	20.5
Psydrax obovata	3	1.7	50.5
Asplenium adiantum	3	0.1	1
Capparis sepiaria	3	0.9	25.5
Cynanchum viminale	3	0.7	20.5
Senecio angulatus	3	0.3	8
Pilogyne scabra	3	0	0
Felicia echinata	2	0.1	3
Ehrharta villosa	2	0.1	3
Panicum maximum	2	1.5	88
Afrocanthium mundianum	2	1.5	88
Osteospermum moniliferum	2	0.6	38
Pupalia lappacea	2	0.1	3
Adenocline acuta	2	0.1	3
Clematis brachiata	2	0.1	3
Roepera morgsana	2	0.2	13
Urtica dioica	2	0.1	3
Diospyros villosa	2	0.1	3
Colpoon compressum	2	0.1	3
Carpobrotus deliciosus	2	0.1	3
Cassytha ciliolata	2	0.1	3
Bonatea antennifera	2	0.1	3
Searsia rehmanniana	2	0.1	3
Rhamnus prinoides	2	0.1	3
Asparagus suaveolens	2	0.2	13
Jasminum angulare	2	0.1	3
Tarchonanthus camphoratus	2	1.5	88
Euphorbia mammillaris	2	0.2	13
Secamone filiformis	2	0.1	3
Euphorbia triangularis	2	0.1	3
Euphorbia mauritanica	2	0.6	38
Plumbago auriculata	2	0.2	13
Ochna serrulata	2	0.2	13
Pulicaria scabra	2	0.1	3
Commelina benghalensis	2	0.1	3
Cynodon dactylon	2	0.1	3
Themeda triandra	2	0.1	3
Drosanthemum intermedium	2	0.1	3
Pelargonium odoratissimum	2	0.1	3
Mesembryanthemum aitonis	2	0.1	3
Asplenium cordatum	2	0.1	3
Asparagus scandens	2	0.1	3
Urtica lobulata	2	0.1	3
Euphorbia kraussiana	2	0.1	3
Celtis africana	2	0	0
Solanum africanum	2	0.1	5
Geranium incanum	2	0.1	3
Carpobrotus edulis	2	0.1	3
Trachyandra divaricata	2	0	2
Adiantum aethiopicum	2	0	2
Senecio rigidus	2	0	1
Asparagus rubicundus	2	0	0
Leonotis leonurus	2	0	0
Haplocarpha lanata	2	0	0

## Sheet: Xeric DT
Xeric Dune Thicket
Releves	13
Species	141
Species	Freq %	Average cover % (Barkman's TCV)	Average non-zero cover %
Euclea racemosa	92	13.4	14.5
Pterocelastrus tricuspidatus	92	25	27.1
Olea exasperata	92	11.6	10.8
Sideroxylon inerme	92	33.8	36.7
Asparagus aethiopicus	92	2.4	2.4
Searsia glauca	85	7.2	8.5
Restio eleocharis	69	2.9	3.2
Carissa bispinosa	69	3	4.3
Anemone vesicatoria	62	0.9	0.8
Roepera morgsana	62	4.8	7.8
Cynanchum obtusifolium	62	0.3	0.2
Robsonodendron maritimum	62	0.9	0.9
Lauridia tetragona	62	1.9	3.1
Rhoicissus digitata	62	2.9	4.1
Colpoon compressum	54	3.2	5.1
Euphorbia burmannii	54	2.6	4.9
Panicum deustum	54	0.3	0.4
Crassula expansa	46	0.1	0.1
Mystroxylon aethiopicum	46	9.1	19.7
Kedrostis nana	46	0	0
Cussonia thyrsiflora	46	3.1	6.7
Asparagus capensis	38	0.6	1
Lachenalia bulbifera	38	0.2	0.2
Cissampelos capensis	38	0.2	0.3
Solanum africanum	38	0.6	1.3
Searsia pterota	38	6.8	17.6
Helichrysum teretifolium	38	0.3	0.5
Myrsine africana	31	0.9	2.4
Chironia baccifera	31	0.1	0.1
Tetragonia fruticosa	31	0.4	1
Cotyledon orbiculata	31	0.1	0.1
Carpobrotus acinaciformis	31	0	0
Cynanchum viminale	31	0.7	1.8
Azima tetracantha	31	1.8	5.8
Putterlickia pyracantha	31	1.2	3
Maytenus procumbens	31	1.6	5.3
Searsia crenata	31	1.6	4.2
Cassine peragua	23	2.5	11
Metalasia muricata	23	0.6	1.6
Astephanus triflorus	23	0	0
Asparagus volubilis	23	0	0
Ficinia dunensis	23	0	0
Crassula pubescens	23	0	0
Agathosma apiculata	23	0.6	2
Crassula subulata	23	0.1	0.2
Carpobrotus deliciosus	23	0.1	0.2
Bonatea speciosa	23	0.1	0.2
Ficinia ramosissima	15	0.2	1
Osteospermum moniliferum	15	0.2	1
Passerina paleacea	15	0.3	2
Phylica ericoides	15	0.3	2
Felicia amoena	15	0.1	0.3
Searsia lucida	15	0.5	3
Helichrysum patulum	15	0	0
Polygala myrtifolia	15	0.4	2.5
Didymodoxa capensis	15	0.1	0.3
Cineraria geifolia	15	0.2	0.7
Zehneria scabra	15	0	0
Rubia petiolaris	15	0	0
Pentameris curvifolia	15	0	0
Ehrharta calycina	15	0	0
Cynanchum africanum	15	0	0
Asparagus setaceus	15	0.1	0.3
Roepera flexuosa	15	0.2	1
Clausena anisata	15	0.6	4
Haemanthus albiflos	15	0.1	0.3
Chionanthus foveolatus	15	0.8	5
Jamesbrittenia microphylla	15	0.1	0.3
Muraltia spinosa	15	0.1	0.3
Chaenostoma campanulatum	15	0	0
Scolopia zeyheri	15	1.3	8.5
Scutia myrtina	15	0.2	1
Euphorbia mauritanica	15	0.5	3
Crassula nudicaulis	15	0	0
Asparagus asparagoides	15	0	0
Ficinia lateralis	8	0.4	5
Erica coccinea	8	0.2	3
Senecio arniciflorus	8	0.2	3
Thesium confusum	8	0.2	2
Helichrysum dasyanthum	8	0.1	1
Restio calcicola	8	0	0
Otholobium bracteolatum	8	0	0
Searsia laevigata	8	0	0
Wachendorfia paniculata	8	0	0
Gazania krebsiana	8	0	0
Gladiolus gueinzii	8	0	0
Lycium ferocissimum	8	0.2	2
Sporobolus virginicus	8	0	0
Salvia aurea	8	0	0
Anthospermum prostratum	8	0	0
Thesium frisea	8	0	0
Scadoxus puniceus	8	0	0
Othonna undulosa	8	0	0
Restio leptoclados	8	0	0
Viscum rotundifolium	8	0	0
Oxalis incarnata	8	0.2	3
Adenocline violifolia	8	0.1	1
Geranium incanum	8	0	0
Chasmanthe aethiopica	8	0	0
Gasteria carinata	8	0	0
Mesembryanthemum canaliculatum	8	0	0
Schotia afra	8	0.4	5
Aloe africana	8	0.2	3
Rhoiacarpos capensis	8	0.2	3
Viscum obscurum	8	0.1	1
Convolvulus bidentatus	8	0	0
Cysticapnos cracca	8	0	0
Jordaaniella maritima	8	0.2	3
Jamesbrittenia stellata	8	0.1	1
Ledebouria ovalifolia	8	0	0
Zaluzianskya gracilis	8	0	0
Brunsvigia orientalis	8	0	0
Indigofera candicans	8	0	0
Lachenalia punctata	8	0	0
Heliophila linearis	8	0	0
Dovyalis rhamnoides	8	0.1	1
Stipagrostis zeyheri	8	0	0
Senecio elegans	8	0	0
Senecio litorosus	8	0	0
Felicia echinata	8	0	0
Helichrysum versicolor	8	0	0
Otholobium algoensis	8	0	0
Astephanus zeyheri	8	0	0
Senecio ilicifolius	8	0	0
Cerastium capense	8	0	0
Pharnaceum thunbergii	8	0	0
Roepera maritima	8	0	0
Clematis brachiata	8	0	0
Oxalis depressa	8	0	0
Agathosma collina	8	0.2	3
Phylica axillaris	8	0.1	1
Oncosiphon suffruticosus	8	0	0
Ficinia bulbosa	8	0	0
Crassula campestris	8	0	0
Muraltia satureioides	8	0	0
Dovyalis rotundifolia	8	0.4	5
Eustachys paspaloides	8	0	0
Hellmuthia membranacea	8	0	0
Rhynchosia caribaea	8	0	0
Agathosma cerefolium	8	0.2	3
Indigofera porrecta	8	0	0

## Sheet: Grootbos SV
Grootbos Strandveld
Releves	14
Species	147
Species	Freq %	Average cover % (Barkman's TCV)	Average non-zero cover %
Pelargonium betulinum	86	0.8	0.4
Passerina corymbosa	79	7.8	9.1
Anthospermum aethiopicum	71	1.6	1.5
Euclea racemosa	71	5.3	6.1
Metalasia muricata	64	6.5	8.2
Restio eleocharis	64	15.3	23.8
Erica irregularis	64	16.1	20.5
Tetraria cuspidata	64	6.3	9.8
Indigofera brachystachya	64	6.3	8.7
Searsia laevigata	50	0.4	0.3
Ficinia indica	50	8.4	11.6
Olea capensis	50	2.1	4.1
Pentameris colorata	50	5.3	8.1
Phylica ericoides	43	0.7	0.9
Clutia polygonoides	43	2.2	4.3
Anthospermum spathulatum	43	1	1.4
Thamnochortus erectus	43	5.7	13.3
Jamesbrittenia albomarginata	36	0.3	0.2
Hermannia ternifolia	36	0.6	1.3
Muraltia salsolacea	36	4	9.2
Searsia lucida	36	0.5	1
Cassytha ciliolata	36	2.5	5.7
Phylica dodii	36	0.2	0
Massonia pustulata	36	0.2	0.1
Carpobrotus acinaciformis	29	0.5	1
Pelargonium myrrhifolium	29	0.4	0.7
Scabiosa columbaria	29	0.3	0.5
Ficinia gracilis	29	0.5	0.7
Ficinia tristachya	29	4	9.2
Leucadendron coniferum	21	4.6	21.7
Helichrysum dasyanthum	21	0.4	1.3
Cassine peragua	21	2.2	7.5
Hermannia joubertiana	21	0.4	1
Crassula subulata	21	0.3	0.6
Struthiola salteri	21	0.5	1.8
Tribolium hispidum	21	0.1	0.2
Metalasia densa	21	0.8	2.8
Agathosma cerefolium	21	1.5	7
Nemesia affinis	21	0.1	0
Olea exasperata	21	4	18.7
Satyrium carneum	21	0.2	0.4
Ficinia bulbosa	14	0.1	0
Cissampelos capensis	14	0.1	0
Linum africanum	14	0.1	0.3
Crassula glomerata	14	0.1	0
Limonium scabrum	14	0.1	0
Agathosma imbricata	14	0.4	1.7
Oedera capensis	14	1.1	8
Gazania pectinata	14	0.1	0
Heliophila africana	14	0.1	0.3
Gnidia juniperifolia	14	0.1	0.3
Watsonia stenosiphon	14	0.1	0.3
Aspalathus globulosa	14	0.8	3.3
Anemone vesicatoria	14	0.1	0
Morella quercifolia	14	1.8	12.5
Cymbopogon marginatus	14	1.6	11
Leucospermum patersonii	14	1.1	7.5
Babiana nana	14	0.1	0
Willdenowia teres	14	1.5	10.5
Koeleria capensis	14	0.1	0
Aspalathus ciliaris	14	0.1	0
Crassula fascicularis	14	0.1	0
Pterocelastrus tricuspidatus	14	0.1	0
Salvia aurea	14	0.8	3.3
Erica plukenetii	14	0.7	5
Myrsine africana	14	0.1	0.3
Oxalis pardalis	14	0.1	0
Helichrysum crispum	14	0.5	2
Selago canescens	14	0.1	0
Cliffortia ilicifolia	14	2.9	20
Otholobium bracteolatum	14	0.9	6
Metalasia brevifolia	14	0.6	4.5
Selago aspera	14	0.4	1.7
Muraltia satureioides	14	1.5	6.7
Diosma subulata	14	1.8	12.5
Aspalathus salteri	14	2.1	15
Colchicum eucomoides	7	0	0
Asparagus volubilis	7	0	0
Crassula expansa	7	0	0
Festuca scabra	7	0	0
Ehrharta calycina	7	0	0
Phylica disticha	7	0.7	10
Asparagus capensis	7	0	0
Chrysocoma coma	7	0.1	2
Helichrysum patulum	7	0.1	2
Agathosma ciliaris	7	0.1	1
Elegia tectorum	7	0.4	5
Albuca fragrans	7	0	0
Asparagus rubicundus	7	0.1	2
Disparago anomala	7	0.1	1
Drosanthemum intermedium	7	0.1	1
Seriphium plumosum	7	0.1	1
Athanasia trifurcata	7	0	0
Protea repens	7	0.7	10
Leucadendron salignum	7	0.1	1
Pelargonium capitatum	7	0	0
Hypodiscus willdenowia	7	0	0
Chascanum cernuum	7	0	0
Erica magnisylvae	7	0	0
Wahlenbergia tenella	7	0	0
Melica racemosa	7	0	0
Erica sessiliflora	7	1.8	25
Gladiolus miniatus	7	0	0
Lycium afrum	7	0	0
Sebaea exacoides	7	0	0
Pelargonium suburbanum	7	0	0
Pelargonium sabulosum	7	0	0
Pelargonium triste	7	0	0
Disparago ericoides	7	1.4	20
Chironia baccifera	7	0.1	1
Phylica amoena	7	0	0
Microdon dubius	7	0	0
Helichrysum niveum	7	0.1	1
Felicia amoena	7	0	0
Lessertia capensis	7	0	0
Isolepis marginata	7	0	0
Kiggelaria africana	7	0.1	1
Galium tomentosum	7	0	0
Felicia echinata	7	0.4	5
Asparagus aethiopicus	7	0.2	3
Thesium scabrum	7	0	0
Thesium crassifolium	7	0	0
Dipogon lignosus	7	0.1	2
Roepera flexuosa	7	0	0
Pseudoselago verbenacea	7	0	0
Ficinia trichodes	7	0.1	2
Anemone anemonoides	7	0	0
Moraea bulbillifera	7	0	0
Polygala meridionalis	7	0	0
Babiana montana	7	0	0
Albuca juncifolia	7	0	0
Lampranthus amabilis	7	0	0
Ehrharta villosa	7	0	0
Chionanthus foveolatus	7	0	0
Cynanchum africanum	7	0.1	2
Clutia alaternoides	7	1.1	15
Osteospermum moniliferum	7	0.4	5
Pelargonium cucullatum	7	0.2	3
Aspalathus forbesii	7	0	0
Manulea cheiranthus	7	0	0
Ficinia ramosissima	7	0.7	10
Restio leptoclados	7	0.7	10
Restio triticeus	7	0	0
Erica corifolia	7	0.4	5
Thesium capitatum	7	0.4	5
Ruschia sarmentosa	7	0	0
Searsia glauca	7	1.1	15

## Sheet: Goukamma SV
Goukamma Strandveld
Releves	97
Species	84
Species	Freq %	Average cover % (Barkman's TCV)	Average non-zero cover %
Restio eleocharis	97	23.9	23.4
Metalasia muricata	81	12.5	11.7
Olea exasperata	67	3.5	3.2
Tetraria cuspidata	63	5.7	7.5
Imperata cylindrica	62	6	6.8
Anthospermum aethiopicum	62	2	2.1
Muraltia satureioides	62	2.5	2.5
Pentameris heptameris	61	1.4	1.5
Euclea racemosa	61	0.6	0.5
Cliffortia falcata	58	2.2	2.5
Passerina corymbosa	55	7.9	10.9
Ficinia ramosissima	55	3.2	4.3
Carpobrotus edulis	51	0.4	0.3
Chironia decumbens	48	0.2	0.2
Searsia glauca	46	0.2	0.2
Tetraria picta	45	2.3	4
Disparago kraussii	45	2.4	3.4
Kyllinga pauciflora	44	2.7	5.1
Cliffortia linearifolia	43	0.4	0.5
Searsia crenata	37	0.6	0.9
Wahlenbergia thunbergii	37	0.7	1.2
Erica glandulosa	37	2.3	4.1
Clutia rubricaulis	34	0.4	0.6
Ficinia lateralis	34	2.1	4.4
Muraltia squarrosa	34	4.3	9.8
Cymbopogon marginatus	34	0.7	1.3
Ehrharta calycina	31	0.6	1
Anthospermum prostratum	31	0.5	1
Helichrysum cymosum	30	0.2	0.3
Agathosma muirii	29	3.5	8.6
Lachnaea diosmoides	29	0.2	0.2
Helichrysum teretifolium	29	1	2.2
Euphorbia erythrina	26	0.1	0.1
Limonium scabrum	24	0.5	1.2
Stipagrostis zeyheri	21	0.8	2.3
Heliophila linearis	20	0.1	0.1
Astephanus zeyheri	20	0.1	0.2
Centella tridentata	19	0.1	0
Ficinia bulbosa	18	0.2	0.8
Anemone vesicatoria	18	0.1	0.1
Geranium incanum	16	0.2	0.6
Cerastium capense	16	0.1	0.1
Indigofera frondosa	16	0.9	3.5
Pelargonium betulinum	16	0.2	0.5
Erica glumiflora	15	0.5	2.3
Chaenostoma hispidum	15	0.2	0.6
Pterocelastrus tricuspidatus	15	0.5	1.8
Heliophila cornuta	14	0.1	0.4
Asparagus suaveolens	14	0	0
Cynanchum africanum	13	0	0
Senecio thunbergii	13	0.1	0.1
Mystroxylon aethiopicum	13	0.1	0.3
Melica racemosa	12	0.1	0.4
Viscum capense	12	0	0
Cyperus obtusiflorus	12	0.1	0.6
Morella cordifolia	12	2.4	19.3
Linum thunbergii	12	0.1	0.6
Lotononis umbellata	12	0.3	1.3
Thesium densiflorum	11	0	0.1
Scabiosa columbaria	10	0.1	0.8
Polygala ericaefolia	10	0	0
Pharnaceum dichotomum	10	0	0
Rubia petiolaris	10	0.1	0.8
Disparago ericoides	9	0	0
Morella quercifolia	9	1.3	9.5
Tarchonanthus camphoratus	8	0	0
Freesia corymbosa	8	0.1	0.7
Dimorphotheca nudicaulis	8	0	0
Struthiola tomentosa	8	0	0.2
Tribolium hispidum	8	0.2	1.4
Cassine peragua	8	0.1	0.4
Crassula expansa	5	0	0
Asplenium adiantum	5	0	0
Passerina rigida	5	0.5	8.5
Thesium strictum	5	0	0
Cassytha ciliolata	4	0	0
Pteridium aquilinum	4	0	0.4
Acacia cyclops	3	0	0.6
Helichrysum felinum	2	0	0
Lessertia stenoloba	2	0	0
Asparagus aethiopicus	2	0	1
Crossyne guttata	2	0	0
Hebenstretia integrifolia	2	0	0
Astephanus triflorus	1	0	0

## Sheet: St Francis SV
St Francis Strandveld
Releves	24
Species	156
Species	Freq %	Average cover % (Barkman's TCV)	Average non-zero cover %
Restio eleocharis	88	22	25.1
Helichrysum teretifolium	79	7.8	9.8
Anthospermum aethiopicum	75	7.7	10.2
Passerina corymbosa	75	15.2	20.2
Euclea racemosa	75	16	21.3
Felicia echinata	71	5.3	7.4
Searsia glauca	71	7.5	10.6
Olea exasperata	63	17.3	27.7
Restio leptoclados	63	31.9	51
Muraltia squarrosa	58	9.3	15.9
Tetraria cuspidata	58	19.5	33.4
Chironia baccifera	58	2.6	4.4
Searsia lucida	50	2.3	4.7
Searsia laevigata	50	3.8	7.6
Chaenostoma campanulatum	50	4.8	9.7
Cymbopogon marginatus	50	12.1	24.3
Jamesbrittenia microphylla	46	4.1	8.9
Searsia crenata	46	8	17.5
Imperata cylindrica	42	5.6	13.5
Agathosma stenopetala	42	9.8	23.5
Carpobrotus deliciosus	42	2.1	5
Lauridia tetragona	42	4	9.5
Limonium scabrum	42	1.3	3
Pelargonium suburbanum	38	1.1	3
Morella quercifolia	38	14.5	38.6
Maytenus procumbens	38	5.5	14.7
Rapanea gilliana	38	3.4	9.1
Pentameris heptameris	38	7	18.6
Ficinia lateralis	33	8.5	25.5
Anthospermum prostratum	33	1.8	5.5
Cynanchum obtusifolium	33	1	3
Vellereophyton vellereum	33	1	3
Elegia microcarpa	29	11.5	39.4
Otholobium bracteolatum	29	5.7	19.4
Pterocelastrus tricuspidatus	29	3.6	12.3
Rhoicissus tridentata	29	3.6	12.3
Agathosma apiculata	29	13.4	45.9
Ficinia ramosissima	29	5.9	20.1
Disparago ericoides	29	4	13.7
Phylica litoralis	29	2.1	7.3
Metalasia muricata	29	12.5	43
Putterlickia pyracantha	29	5.5	18.7
Sideroxylon inerme	25	1.2	4.7
Salvia aurea	25	2	8
Cynodon dactylon	25	5.1	20.5
Indigofera stricta	25	3	12.2
Cassine peragua	25	1.6	6.3
Cussonia thyrsiflora	25	4.3	17.2
Gazania krebsiana	25	0.8	3
Senecio burchellii	25	0.8	3
Hebenstretia integrifolia	21	2.1	10
Mystroxylon aethiopicum	21	1.5	7
Linum africanum	21	1	5
Satyrium princeps	21	0.6	3
Tephrosia capensis	21	5.6	27
Erica glumiflora	21	7.3	35
Helichrysum cymosum	21	1	5
Cotyledon orbiculata	21	0.6	3
Linum thunbergii	21	0.6	3
Carissa bispinosa	21	2.9	14
Othonna rufibarbis	17	0.5	3
Melica racemosa	17	0.9	5.5
Morella cordifolia	17	2.4	14.3
Cassytha ciliolata	17	0.9	5.5
Helichrysum asperum	17	0.5	3
Ehrharta villosa	17	0.5	3
Stipagrostis zeyheri	17	7	41.8
Tribolium obtusifolium	17	2.4	14.3
Polygala ericaefolia	17	0.5	3
Colpoon compressum	17	5.9	35.5
Thesium strictum	17	0.5	3
Aspalathus spicata	17	2.8	16.8
Schotia afra	17	0.9	5.5
Ficinia albicans	17	1.3	8
Oxalis polyphylla	17	0.5	3
Crassula nudicaulis	17	1.3	8
Anchusa capensis	13	0.4	3
Sporobolus africanus	13	0.4	3
Ficinia bulbosa	13	2.7	21.3
Zaluzianskya maritima	13	0.4	3
Anemone knowltonia	13	0.4	3
Thesium leptocaule	13	0.4	3
Centella tridentata	13	0.4	3
Erica chloroloma	13	3.1	24.7
Roepera maritima	13	0.4	3
Osteospermum moniliferum	13	0.8	6.3
Robsonodendron maritimum	13	0.8	6.3
Themeda triandra	13	3.9	31.3
Setaria sphacelata	13	0.4	3
Crassula expansa	8	0.3	3
Clutia rubricaulis	8	0.3	3
Cullumia decurrens	8	2.1	25.5
Asparagus suaveolens	8	0.3	3
Rhoicissus digitata	8	0.7	8
Pelargonium capillare	8	0.3	3
Heliophila subulata	8	0.3	3
Massonia pustulata	8	0.3	3
Boophone disticha	8	0.3	3
Solanum americanum	8	0.3	3
Asparagus africanus	8	0.3	3
Asplenium adiantum	8	0.3	3
Chasmanthe aethiopica	8	0.3	3
Hypoxis zeyheri	8	0.3	3
Osteospermum imbricatum	8	5.3	63
Silene bellidioides	8	0.3	3
Stenotaphrum secundatum	8	0.7	8
Centella coriacea	8	0.7	8
Tarchonanthus camphoratus	8	0.7	8
Pelargonium grossularioides	8	0.3	3
Seriphium plumosum	4	0.1	3
Chaenostoma polyanthum	4	0.1	3
Eriospermum brevipes	4	0.1	3
Selago corymbosa	4	0.1	3
Hermannia flammea	4	0.1	3
Hermannia althaeifolia	4	0.1	3
Chrysocoma ciliata	4	1.6	38
Kyllinga alba	4	0.1	3
Thamnochortus glaber	4	1.6	38
Commelina benghalensis	4	0.1	3
Clutia daphnoides	4	3.7	88
Indigofera procumbens	4	0.1	3
Manulea obovata	4	0.1	3
Cliffortia filifolia	4	0.5	13
Oxalis incarnata	4	0.1	3
Satyrium coriifolium	4	0.1	3
Felicia amoena	4	0.1	3
Rhamnus prinoides	4	0.1	3
Dasispermum suffruticosum	4	0.1	3
Pelargonium longifolium	4	0.1	3
Cotula sericea	4	0.1	3
Silene primuliflora	4	0.1	3
Struthiola argentea	4	0.1	3
Muraltia scoparia	4	2.8	68
Geranium incanum	4	0.1	3
Kedrostis nana	4	0.1	3
Fuirena hirsuta	4	0.1	3
Searsia incisa	4	0.5	13
Delosperma litorale	4	0.1	3
Pilogyne scabra	4	0.1	3
Indigofera sulcata	4	0.1	3
Aspalathus setacea	4	0.1	3
Viscum obscurum	4	0.1	3
Rubia petiolaris	4	0.1	3
Cyrtanthus loddigesianus	4	0.1	3
Isolepis venustula	4	0.1	3
Scutia myrtina	4	0.1	3
Olea capensis	4	0.1	3
Adenocline pauciflora	4	0.1	3
Jamesbrittenia fruticosa	4	0.1	3
Scabiosa columbaria	4	0.1	3
Aizoon rigidum	4	1.6	38
Ficinia filiformis	4	0.1	3
Thamnochortus insignis	4	0.5	13
Rhoiacarpos capensis	4	0.5	13
Chionanthus foveolatus	4	0.1	3
Lepidium africanum	4	0.1	3

## Sheet: Southwestern SV
Southwestern Strandveld
Releves	34
Species	180
Species	Freq %	Average cover % (Barkman's TCV)	Average non-zero cover %
Restio eleocharis	91	16.3	17.9
Passerina paleacea	74	8.2	11.1
Metalasia muricata	74	7	8.4
Euclea racemosa	71	2.7	3.2
Carpobrotus acinaciformis	68	2.9	4.1
Searsia glauca	68	2.1	2.8
Ficinia ramosissima	65	1.4	2
Phylica ericoides	62	4.3	7
Ficinia lateralis	50	1.6	3.1
Olea exasperata	47	3.4	6.5
Pterocelastrus tricuspidatus	47	1.1	1.6
Roepera flexuosa	47	0.7	1.2
Crassula subulata	47	0.1	0
Felicia amoena	44	0.6	0.9
Anthospermum prostratum	44	0.5	0.8
Helichrysum teretifolium	44	3.4	7.2
Otholobium bracteolatum	41	1.9	3.6
Disparago anomala	41	3.5	8.6
Senecio arniciflorus	35	1	2.6
Crassula umbellata	35	0	0
Ficinia dunensis	35	0.4	0.8
Limonium scabrum	35	0.3	0.5
Asparagus capensis	35	0.7	1.5
Tetragonia fruticosa	32	0.5	1.2
Agathosma collina	32	10.1	31.2
Pentameris curvifolia	32	0.3	0.5
Crassula expansa	32	0.4	0.9
Helichrysum retortum	29	0.9	1.8
Ehrharta calycina	29	0.2	0.3
Muraltia satureioides	29	1.3	3.6
Heliophila linearis	29	0.1	0.1
Restio calcicola	29	2.4	7.4
Chironia baccifera	29	0.5	1.1
Jordaaniella maritima	26	1.3	4.8
Asparagus aethiopicus	26	0.3	0.8
Helichrysum dasyanthum	24	0.5	1.5
Schoenus arenicola	24	0.6	2.8
Lampranthus fergusoniae	24	0.3	1.1
Cassine peragua	24	0.4	1.2
Searsia laevigata	24	0.5	1.3
Crassula pubescens	24	0.1	0.3
Othonna undulosa	21	0.1	0.4
Colpoon compressum	21	0.3	0.7
Koeleria capensis	21	0.1	0.3
Lauridia tetragona	21	0.4	1.7
Helichrysum patulum	18	0.5	3
Tribolium hispidum	18	0.1	0.2
Gazania krebsiana	18	0	0
Jamesbrittenia albomarginata	18	0.2	0.8
Osteospermum moniliferum	18	0.5	2.3
Roepera morgsana	18	0.4	1.4
Indigofera calciphila	18	0.1	0.2
Crassula campestris	18	0	0.1
Hellmuthia membranacea	18	0.4	1.6
Agathosma dielsiana	18	2.1	12.2
Oxalis depressa	18	0	0.1
Morella cordifolia	15	1.8	12
Helichrysum litorale	15	0	0
Satyrium carneum	15	0	0
Erica coccinea	15	3.6	24.4
Robsonodendron maritimum	15	0.2	0.7
Euphorbia burmannii	15	1.2	8.2
Passerina rigida	15	0.5	3
Erica bredasiana	15	2.4	16.4
Agathosma geniculata	15	1.9	10.5
Argyrolobium harmsianum	15	0.4	2
Lachenalia punctata	15	0	0
Trachyandra ciliata	15	0	0.1
Searsia pterota	15	0.2	0.8
Ledebouria ovalifolia	15	0	0
Searsia lucida	12	0.3	1.8
Muraltia spinosa	12	0.4	3.8
Astephanus triflorus	12	0	0
Thesium confusum	12	0.3	2.3
Cotyledon orbiculata	12	0.3	1.8
Rubia petiolaris	12	0	0
Wahlenbergia tenella	12	0.2	1.8
Mesembryanthemum canaliculatum	12	0.2	1.4
Crassula filiformis	12	0	0.1
Silene aethiopica	12	0	0.1
Thamnochortus insignis	12	1.5	12.5
Albuca juncifolia	12	0	0
Isolepis marginata	9	0	0.2
Crassula nudicaulis	9	0	0.2
Searsia crenata	9	0.8	8.7
Acmadenia obtusata	9	0.4	5
Heliophila subulata	9	0	0
Erica vernicosa	9	2.2	18.8
Chaenostoma placidum	9	0.2	2.3
Limeum telephioides	9	0	0
Lachenalia bulbifera	9	0	0.2
Myrsine africana	9	0.2	2
Manulea caledonica	9	0.2	1
Brunsvigia orientalis	9	0	0
Viscum capense	9	0.1	0.6
Indigofera harveyi	9	0	0.2
Sideroxylon inerme	9	0.2	1
Stipagrostis zeyheri	9	0.2	2.3
Phylica axillaris	9	1.6	17.7
Senecio elegans	6	0	0
Chaenostoma hispidum	6	0	0.3
Thesium frisea	6	0	0.3
Pelargonium ovale	6	0.2	1.7
Cassytha ciliolata	6	0	0.3
Senecio arenarius	6	0	0
Senecio burchellii	6	0	0
Thesium commutatum	6	0	0.3
Restio leptoclados	6	0.1	2
Crassula ericoides	6	0	0.3
Elegia microcarpa	6	1.9	31.5
Adromischus caryophyllaceus	6	0.1	1
Moraea tripetala	6	0	0
Berkheya coriacea	6	0.6	10
Adenocline violifolia	6	0	0
Pelargonium betulinum	6	0.2	4
Helichrysum asperum	6	0	0.3
Cynanchum viminale	6	0.1	1
Dianthus albens	6	0	0
Rhoicissus digitata	6	0.2	3
Cynanchum obtusifolium	6	0	0
Agathosma muirii	6	1	17.5
Euphorbia mauritanica	6	0	0.3
Indigofera candicans	6	0	0.3
Nemesia affinis	6	0	0
Oxalis stellata	6	0	0
Jamesbrittenia stellata	6	0.4	7.5
Psoralea repens	3	0.1	2
Cineraria geifolia	3	0	1
Ficinia nodosa	3	0	1
Aspalathus forbesii	3	0.9	30
Diosma guthriei	3	0.2	8
Pharnaceum cordifolium	3	0	0
Indigofera brachystachya	3	0	0
Phylica selaginoides	3	0	1
Wachendorfia paniculata	3	0	0
Salvia aurea	3	0.1	5
Gladiolus floribundus	3	0	0
Crassula dichotoma	3	0	0
Lessertia frutescens	3	0	0
Wahlenbergia calcarea	3	0.1	2
Ehrharta villosa	3	0.1	3
Metalasia pungens	3	0.1	5
Aspalathus globulosa	3	0.1	5
Morella quercifolia	3	0.1	3
Ifloga repens	3	0	0
Oedera genistifolia	3	0	0
Eriocephalus racemosus	3	0.3	10
Annesorhiza macrocarpa	3	0.1	2
Cynanchum africanum	3	0.1	2
Ursinia trifida	3	0	1
Pelargonium myrrhifolium	3	0	0
Dasispermum hispidum	3	0	0
Chrysocoma coma	3	0.1	5
Anthospermum spathulatum	3	0	1
Lessertia miniata	3	0	0
Anthospermum aethiopicum	3	0.1	5
Anemone vesicatoria	3	0	0
Chrysocoma strigosa	3	0	0
Asparagus lignosus	3	0	0
Agathosma apiculata	3	0.1	3
Ehrharta erecta	3	0	0
Oxalis obtusa	3	0	0
Maytenus procumbens	3	0.1	5
Crassothonna capensis	3	0	1
Oncosiphon suffruticosum	3	0	0
Bulbine frutescens	3	0	0
Lessertia stenoloba	3	0	1
Chironia tetragona	3	0.1	2
Rumex cordatus	3	0	0
Ruschia macowanii	3	0.1	5
Solanum africanum	3	0	1
Cynodon dactylon	3	0	0
Hemimeris sabulosa	3	0	0
Coleonema pulchellum	3	0.3	10
Carpobrotus edulis	3	0.1	3
Carissa bispinosa	3	0	0
Drosanthemum candens	3	0	0
Silene undulata	3	0	0
Zaluzianskya gracilis	3	0	0
Pelargonium lobatum	3	0	0

## Sheet: Southeastern SV
Southeastern Strandveld
Releves	11
Species	104
Species	Freq %	Average cover % (Barkman's TCV)	Average non-zero cover %
Restio eleocharis	91	19.8	21.8
Euclea racemosa	82	9.5	11.7
Agathosma apiculata	64	18.5	29
Crassula expansa	55	0.7	0.8
Jamesbrittenia microphylla	55	1.4	2.1
Rapanea gilliana	55	5.7	10.5
Olea exasperata	55	5.1	9.3
Ficinia bulbosa	45	0.4	0.6
Searsia glauca	45	3.5	7.6
Ficinia dunensis	45	0.7	1
Asparagus capensis	36	0.6	1.2
Chaenostoma campanulatum	36	0.1	0.1
Muraltia spinosa	36	6.1	16.8
Elegia microcarpa	36	2.5	7
Searsia laevigata	36	1.5	4.3
Helichrysum teretifolium	36	2.3	6.3
Lauridia tetragona	36	2.4	5.2
Anthospermum aethiopicum	27	0.7	2.7
Metalasia muricata	27	4	14.7
Pentameris heptameris	27	1.6	4.3
Myrsine africana	27	1.5	5.3
Asparagus aethiopicus	27	0.6	1.5
Putterlickia pyracantha	27	2.4	8.7
Cassytha ciliolata	27	0	0
Cotyledon orbiculata	27	0.1	0.2
Muraltia satureioides	27	2.5	9.3
Roepera flexuosa	27	0.6	1.5
Carpobrotus acinaciformis	27	0.6	2.3
Chironia baccifera	27	0.5	1.3
Cynanchum africanum	27	0	0
Pterocelastrus tricuspidatus	27	0.3	0.8
Crassula muscosa	27	0	0
Stipagrostis zeyheri	27	2	7.3
Crassula nudicaulis	27	0	0
Pentameris curvifolia	27	1	2.8
Indigofera candicans	27	0	0
Heliophila linearis	27	0	0
Erica glumiflora	18	2.3	12.5
Passerina corymbosa	18	1.4	5
Carpobrotus deliciosus	18	0.1	0.3
Imperata cylindrica	18	1.8	6.7
Ficinia ramosissima	18	1.5	8
Solanum africanum	18	0.1	0.3
Maytenus procumbens	18	0.5	3
Felicia echinata	18	0	0
Pelargonium grossularioides	18	0	0
Thamnochortus insignis	18	6.4	35
Agathosma cerefolium	18	3.2	17.5
Indigofera porrecta	18	0	0
Felicia tenella	18	0	0
Phylica axillaris	18	0.5	2.5
Crassula campestris	18	0	0
Ehrharta villosa	18	1.2	6.5
Anemone vesicatoria	18	0.1	0.3
Mesembryanthemum canaliculatum	18	0.3	1
Anthospermum prostratum	18	0	0
Chrysocoma ciliata	18	0	0
Ehrharta calycina	18	0.1	0.3
Gazania krebsiana	18	0.1	0.3
Astephanus zeyheri	18	0	0
Pharnaceum thunbergii	18	0	0
Selago thomii	18	0.5	3
Crassula subulata	18	0.1	0.3
Mesembryanthemum aitonis	18	0	0
Polygala myrtifolia	18	0	0
Solanum linnaeanum	9	0.2	2
Asparagus asparagoides	9	0	0
Indigofera verrucosa	9	0.3	3
Tenaxia stricta	9	0.3	3
Ficinia lateralis	9	0	0
Ficinia indica	9	0	0
Panicum maximum	9	0.3	3
Gladiolus floribundus	9	0	0
Helichrysum litorale	9	0	0
Searsia pterota	9	1.4	15
Schoenus australis	9	0.2	2
Cynanchum ellipticum	9	0	0
Indigofera glaucescens	9	1.4	15
Searsia crenata	9	0.5	5
Cynodon dactylon	9	0	0
Helichrysum asperum	9	0	0
Limonium scabrum	9	0.1	1
Crassula pubescens	9	0	0
Sideroxylon inerme	9	0.3	3
Lachenalia bulbifera	9	0	0
Euphorbia burmannii	9	0.1	1
Clutia daphnoides	9	0.1	1
Carissa bispinosa	9	0.1	1
Gasteria carinata	9	0	0
Colpoon compressum	9	0.1	1
Rhoicissus tridentata	9	0.1	1
Otholobium algoensis	9	0.5	5
Morella quercifolia	9	0.5	5
Coleonema pulchellum	9	0.9	10
Phylica ericoides	9	2.7	30
Helichrysum versicolor	9	0	0
Helichrysum cymosum	9	0.1	1
Selago canescens	9	0.3	3
Achyranthemum argenteum	9	0.3	3
Passerina rigida	9	0.3	3
Roepera maritima	9	0.3	3
Searsia lucida	9	0.2	2
Rhoicissus digitata	9	0	0
Zaluzianskya maritima	9	0	0
